# Supplementary material for: aPPRove: An HMM-Based Method for Accurate Prediction of RNA-Pentatricopeptide Repeat Protein Binding Events
Source: PubMed Central journal article supplement (PMC4999063; doi:10.1371/journal.pone.0160645), 2016-08-25

**Distributions of Normalized Scores of Every Alignment to the Target Database of Each Protein and Its Target Site**

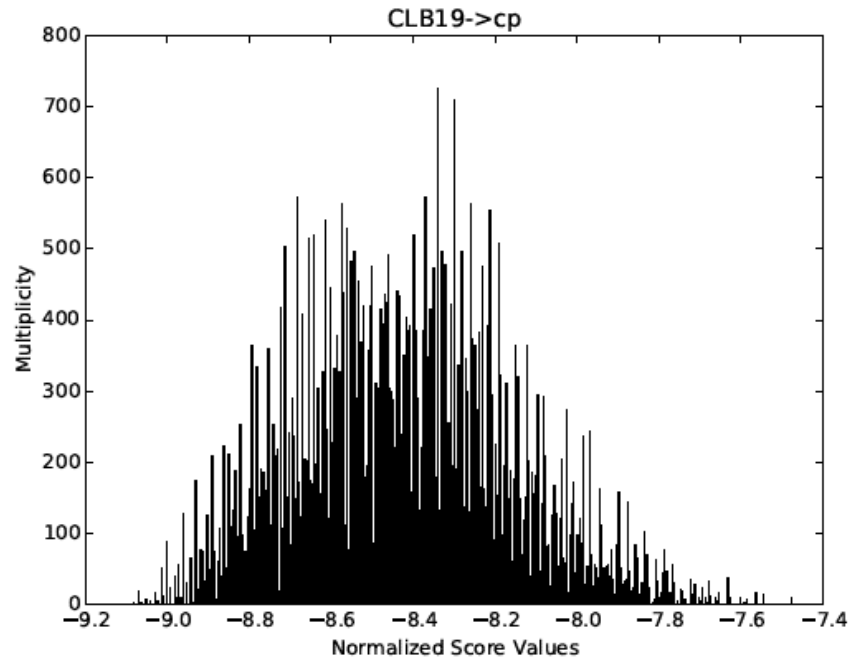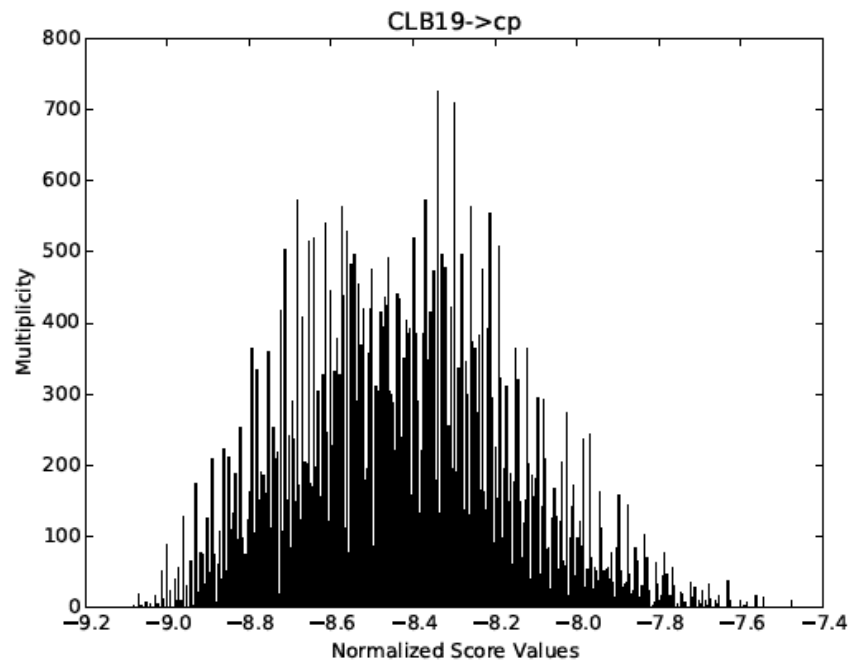

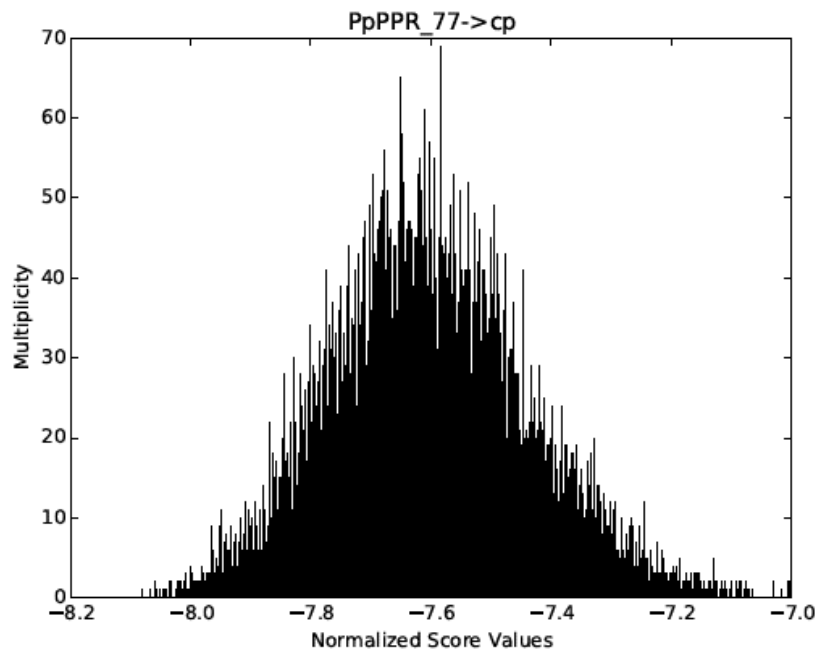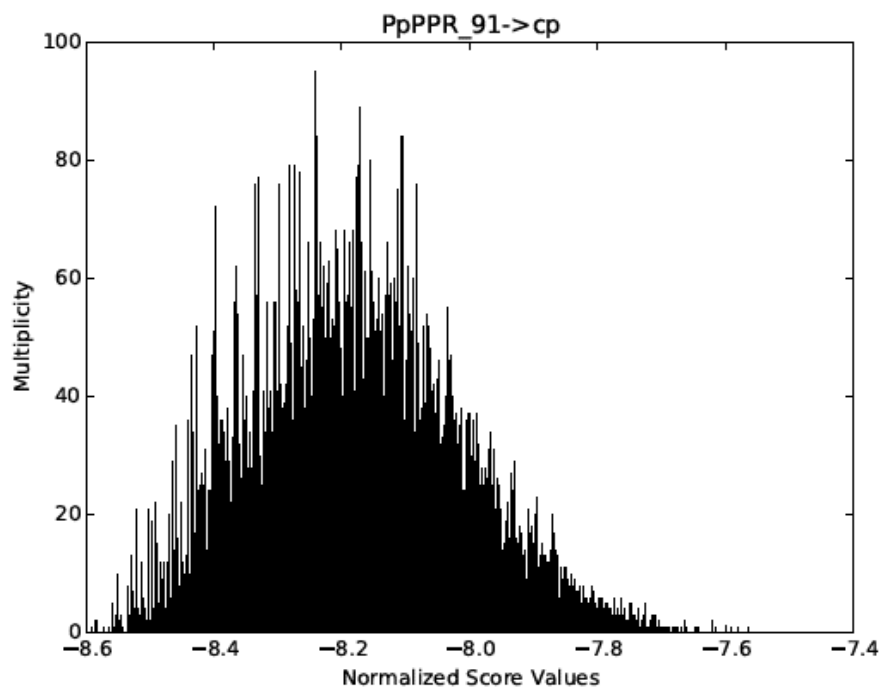

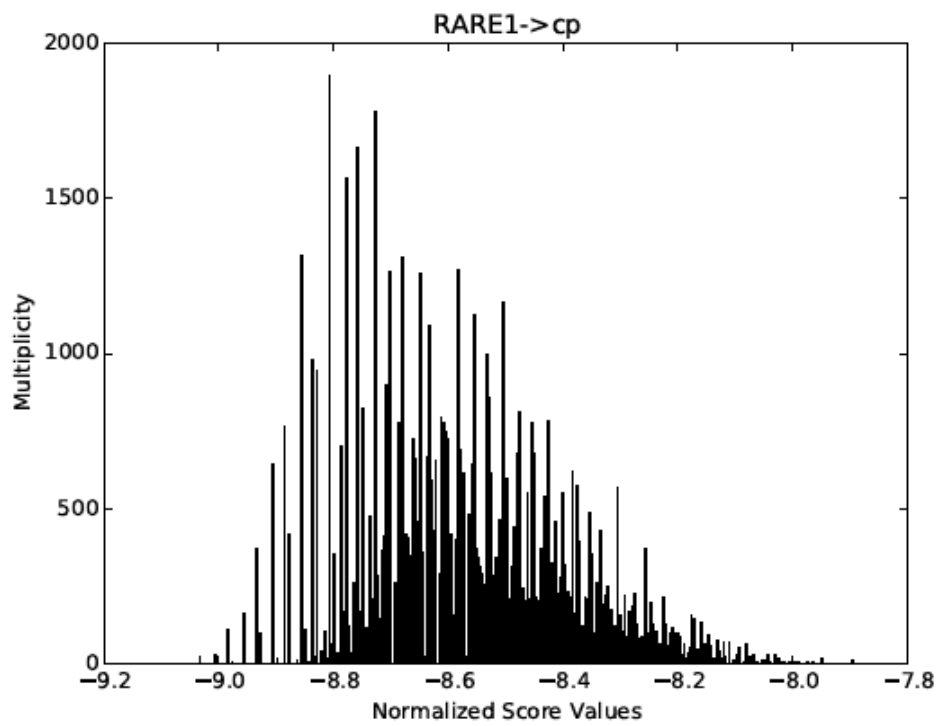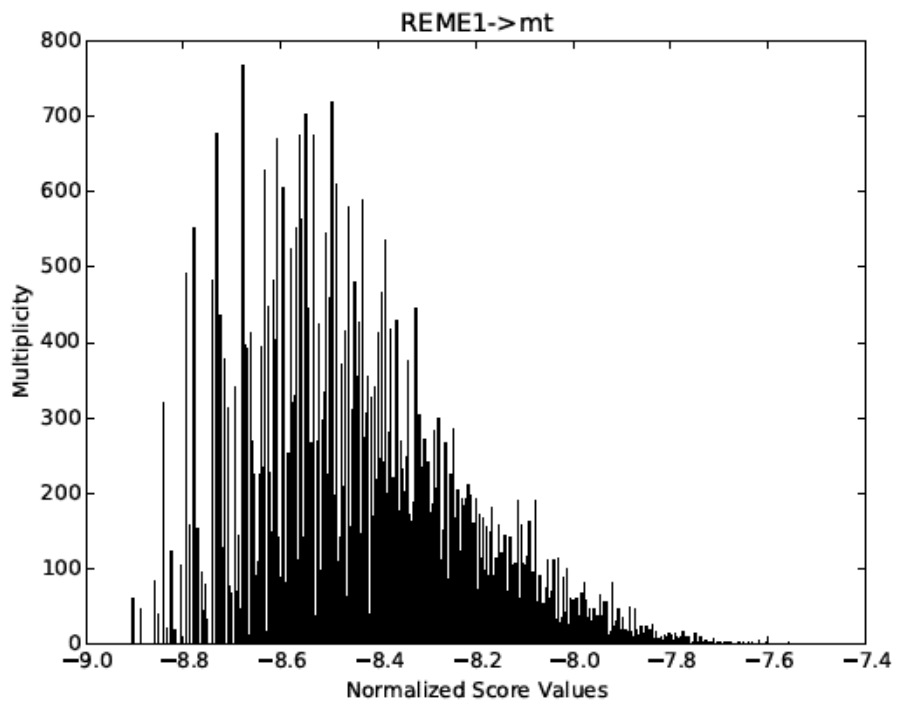

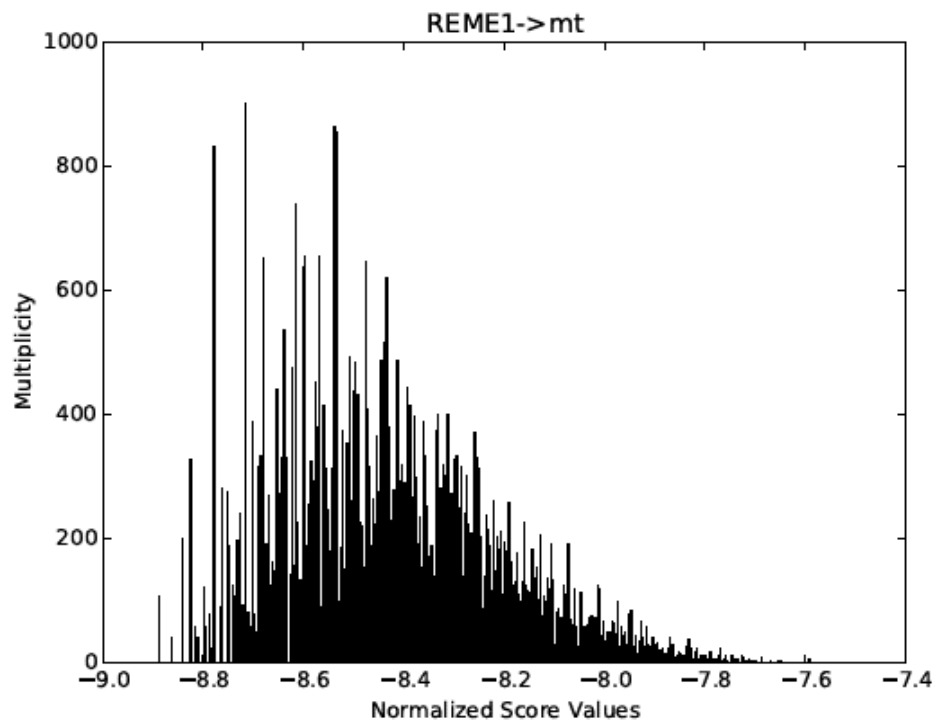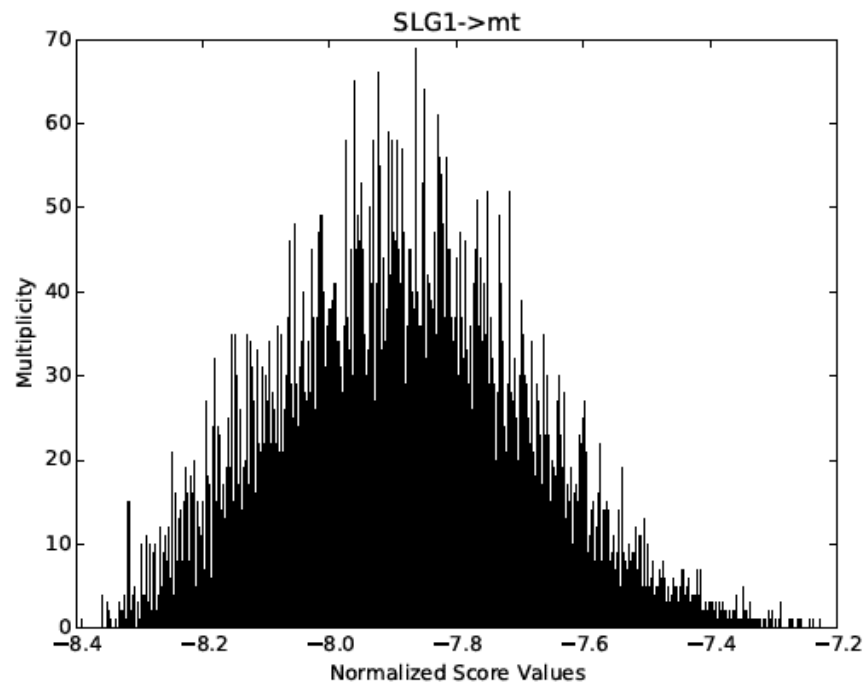

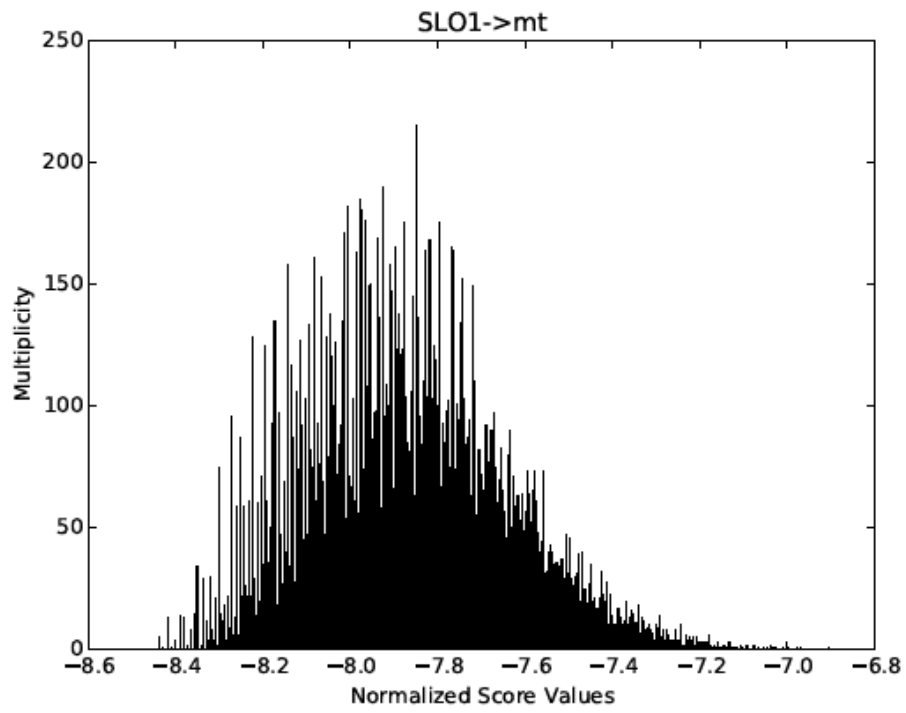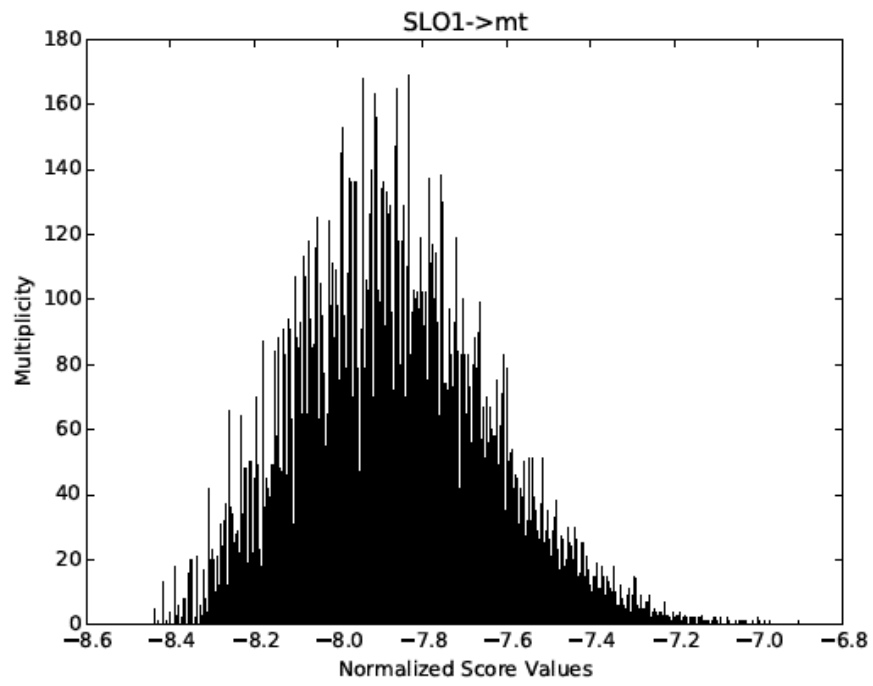

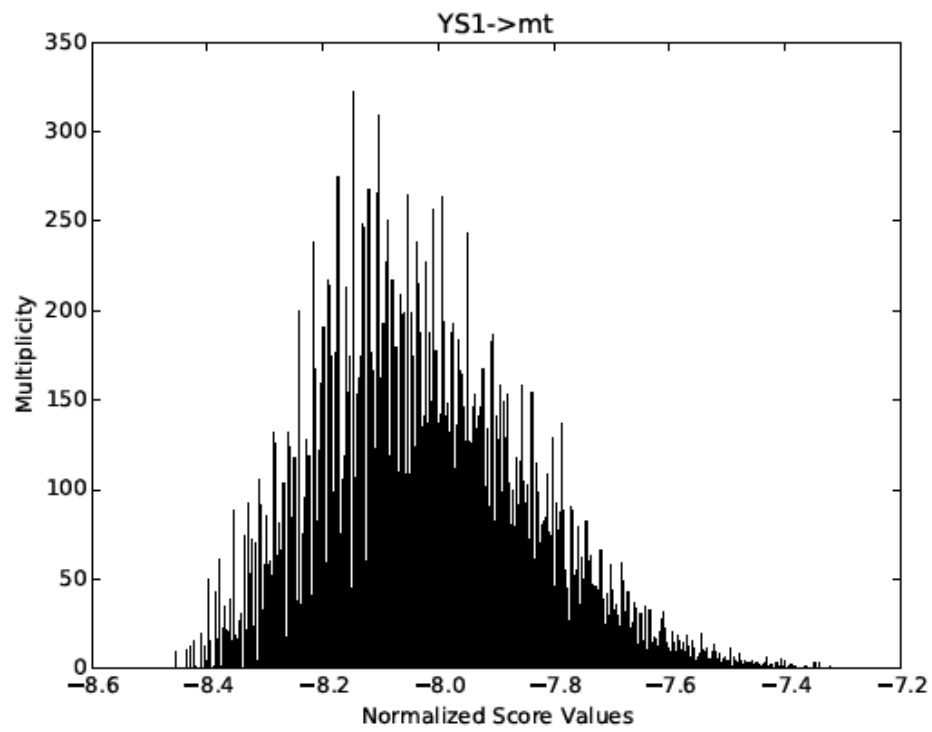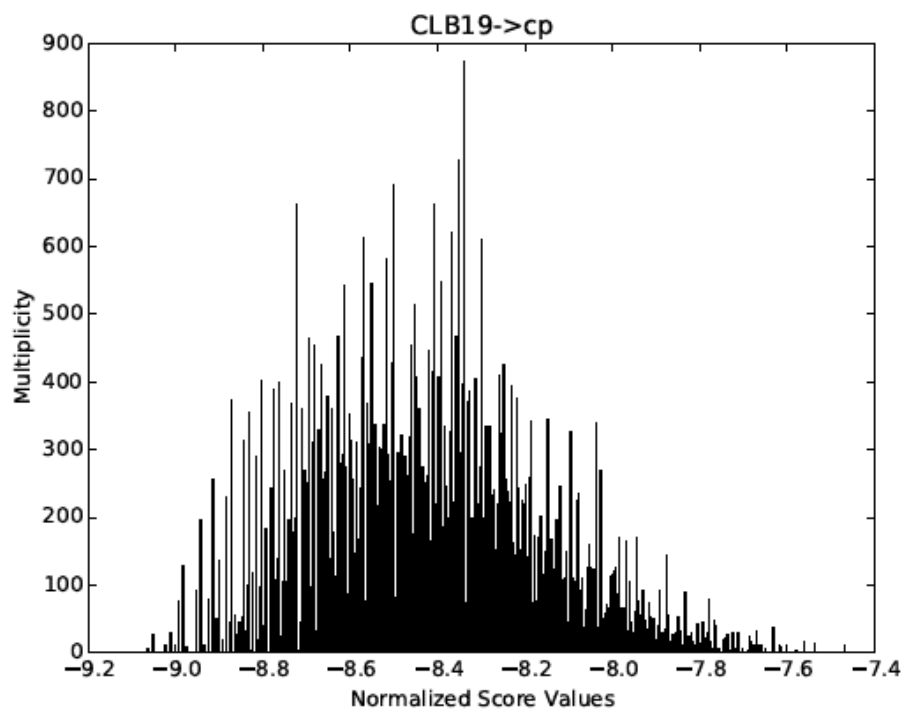

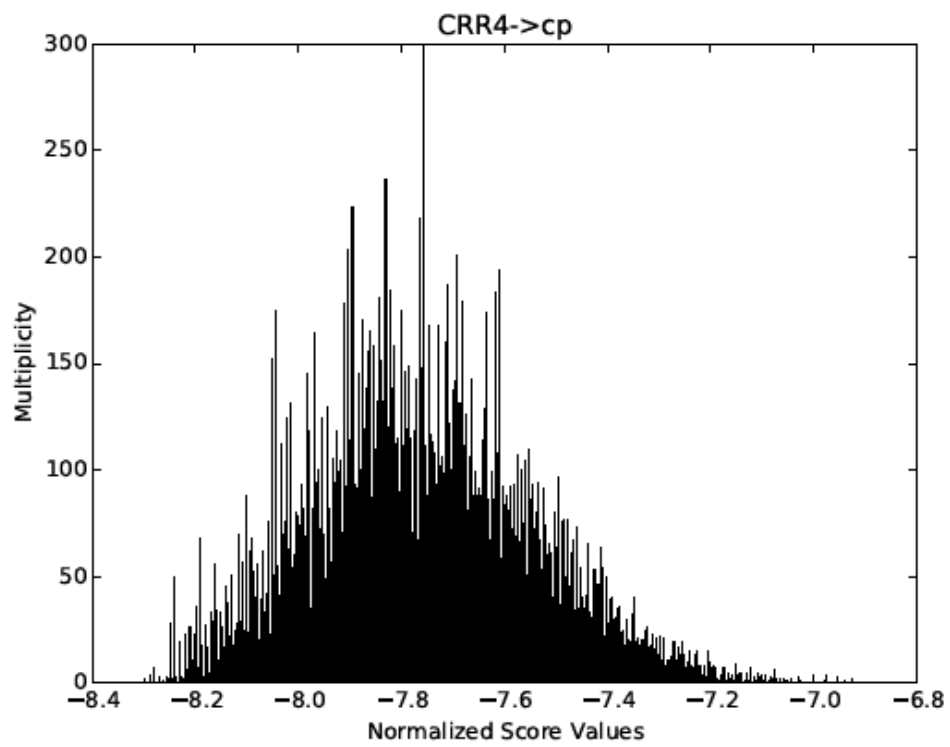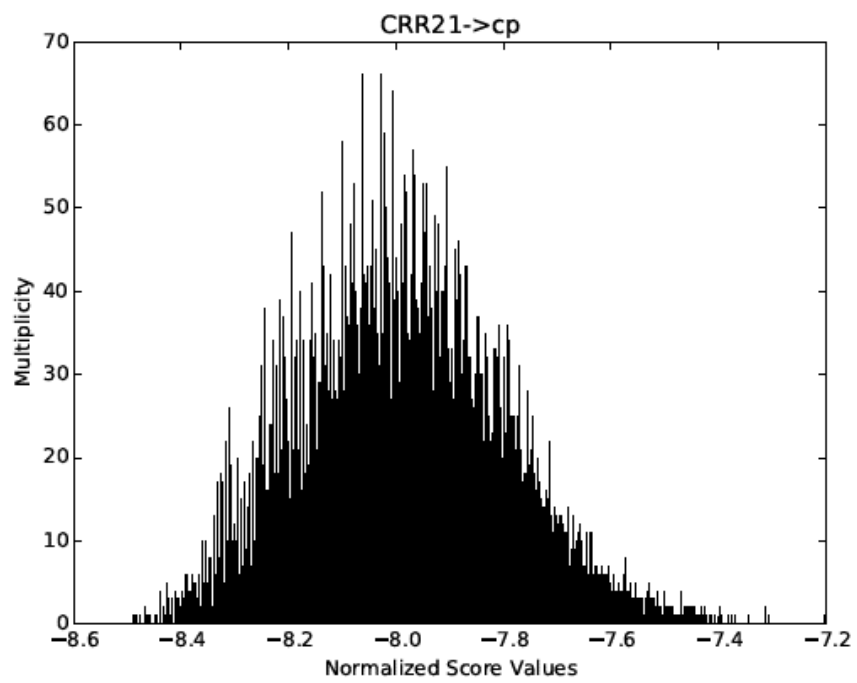

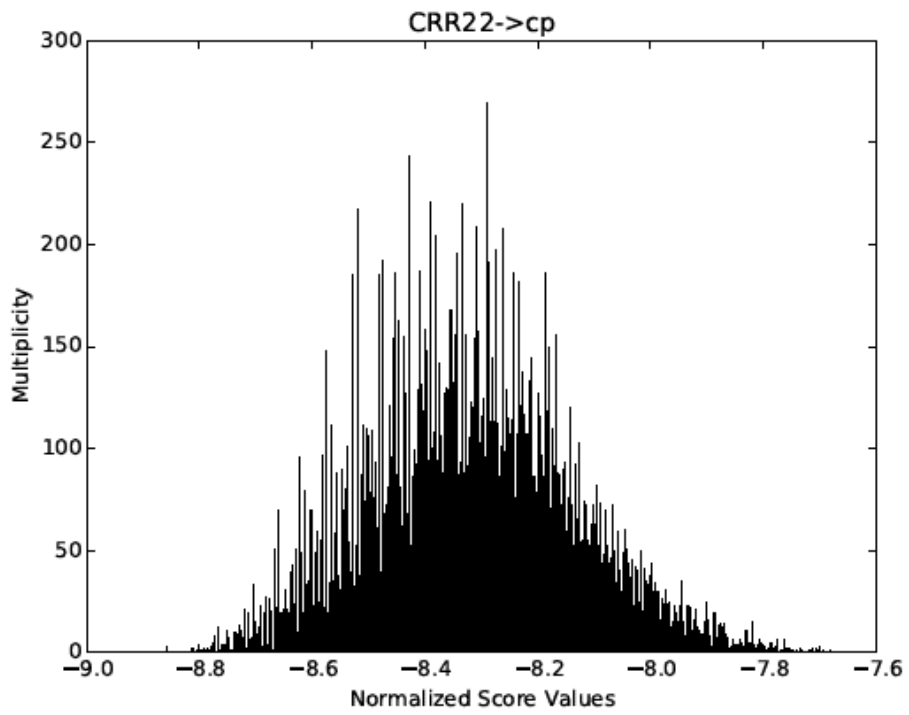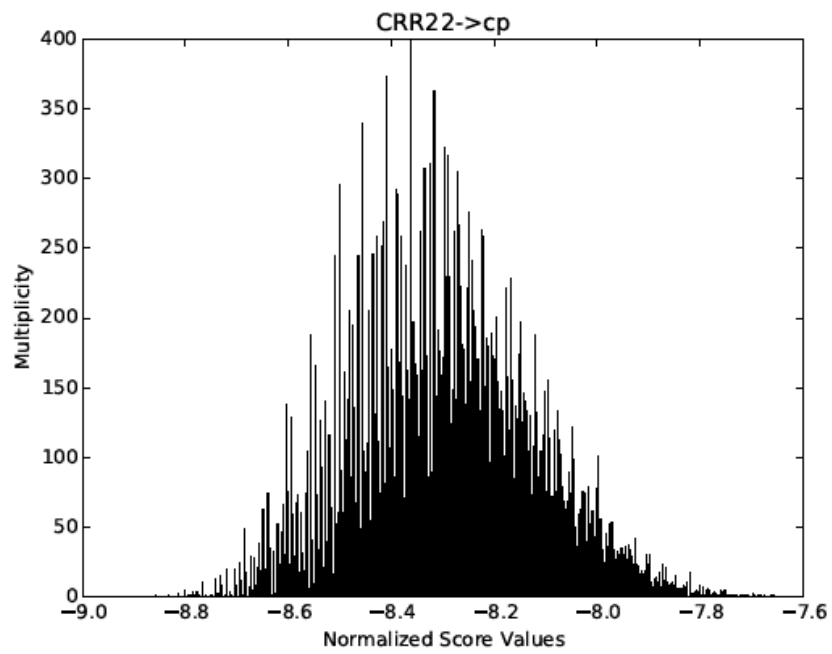



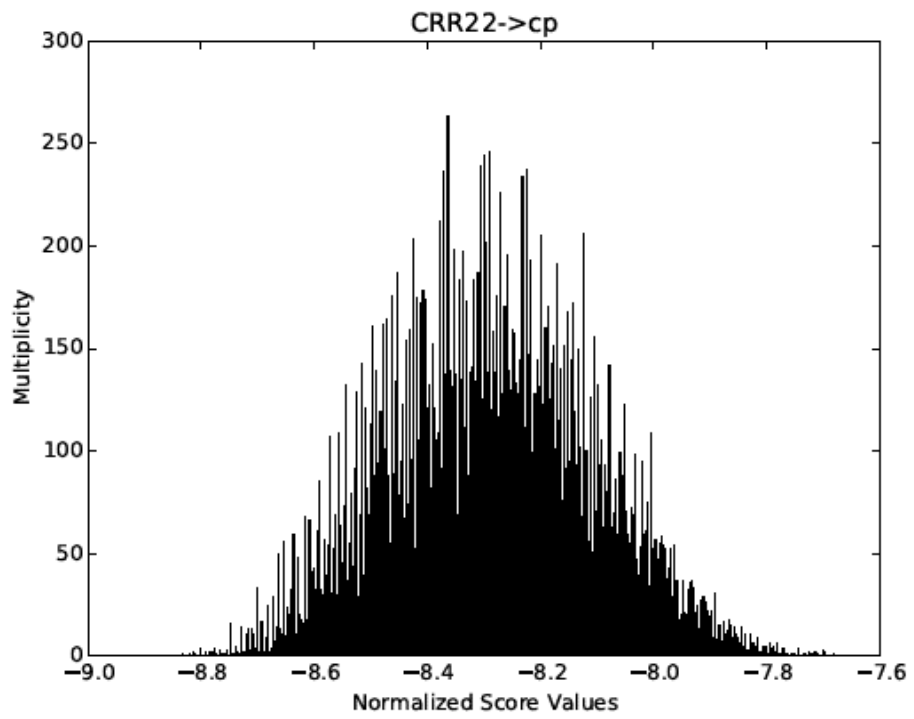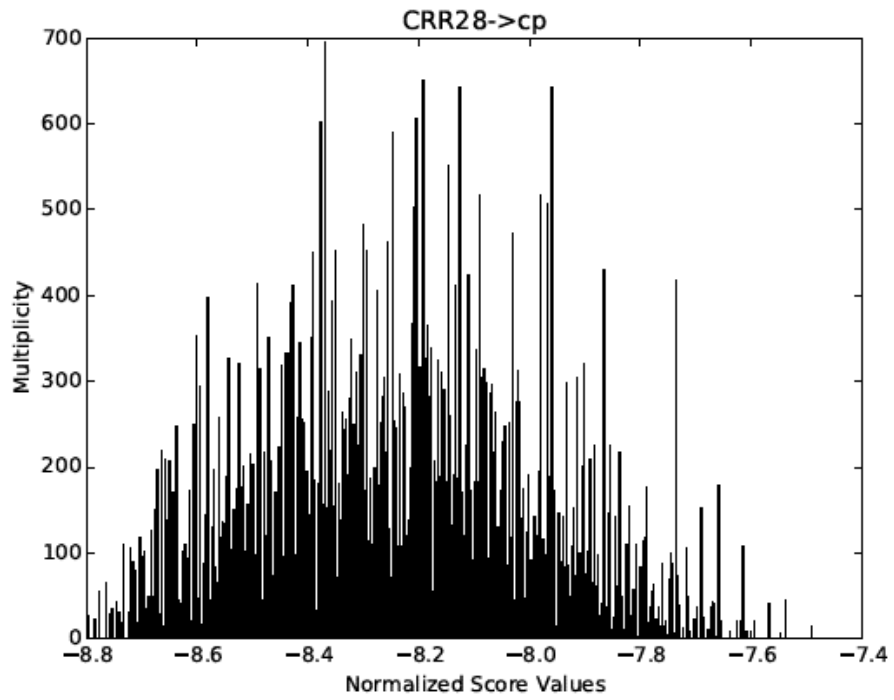

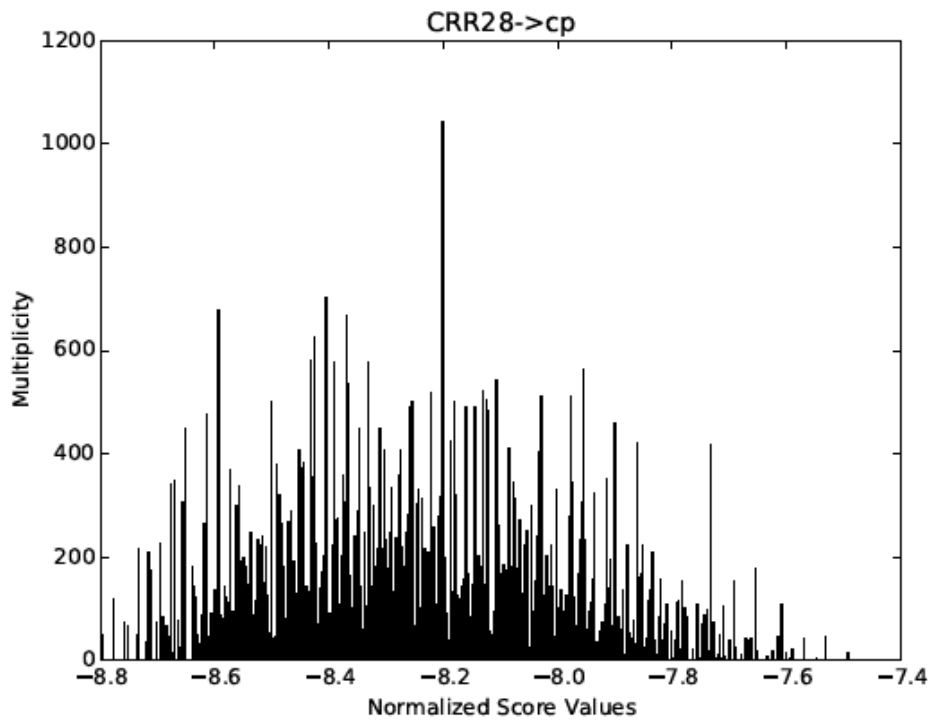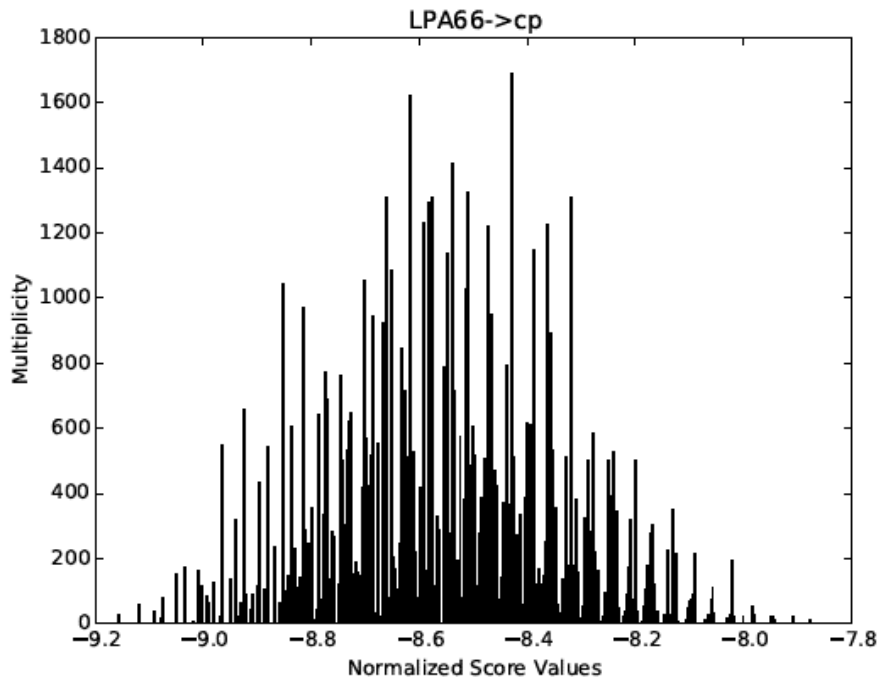

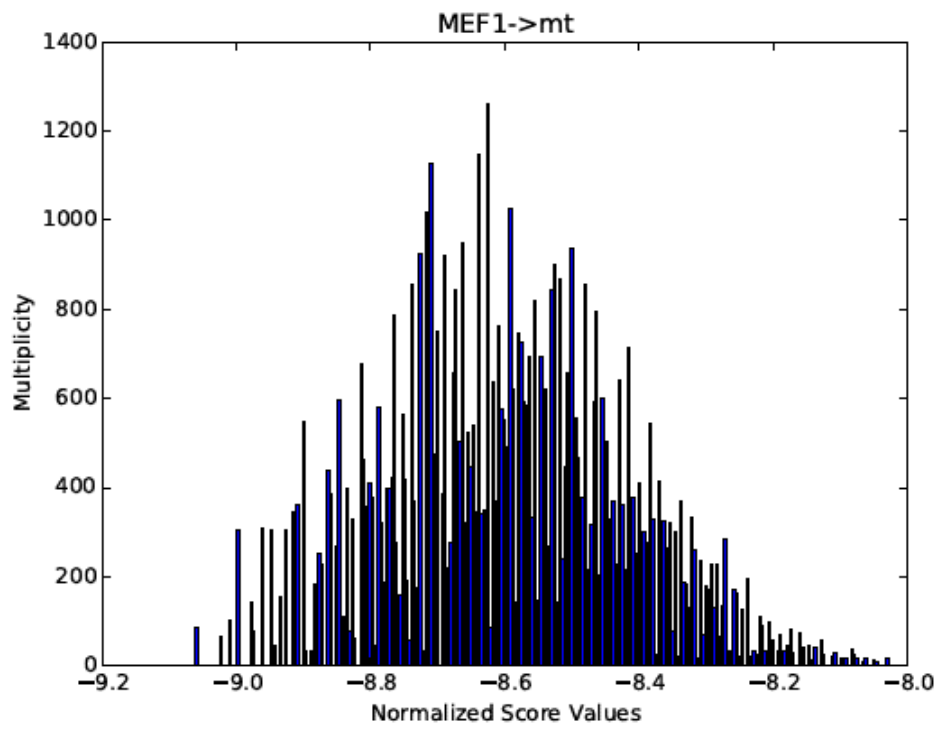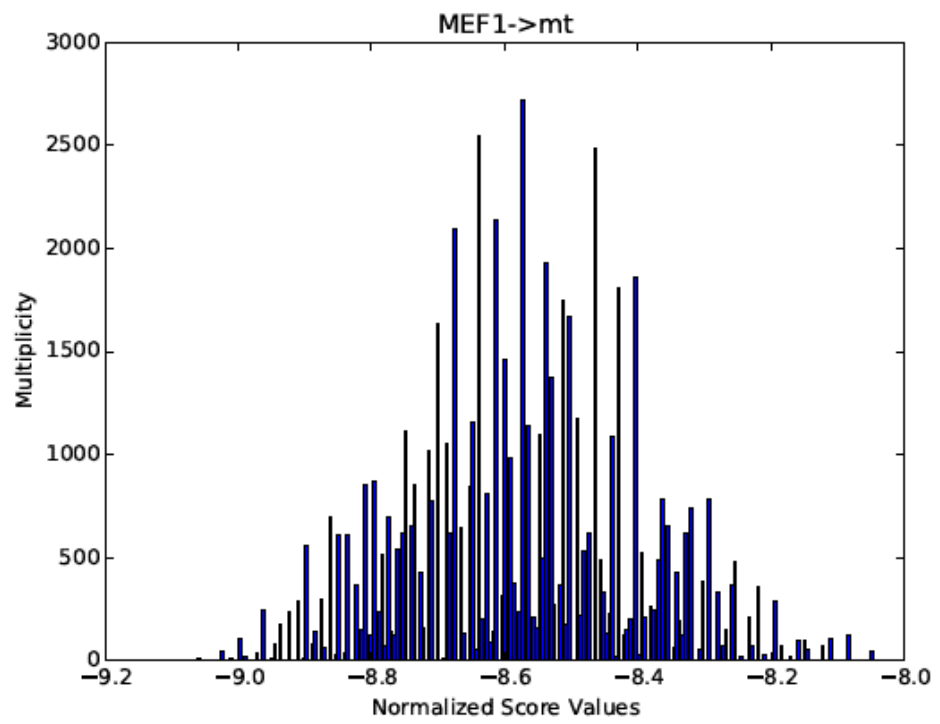

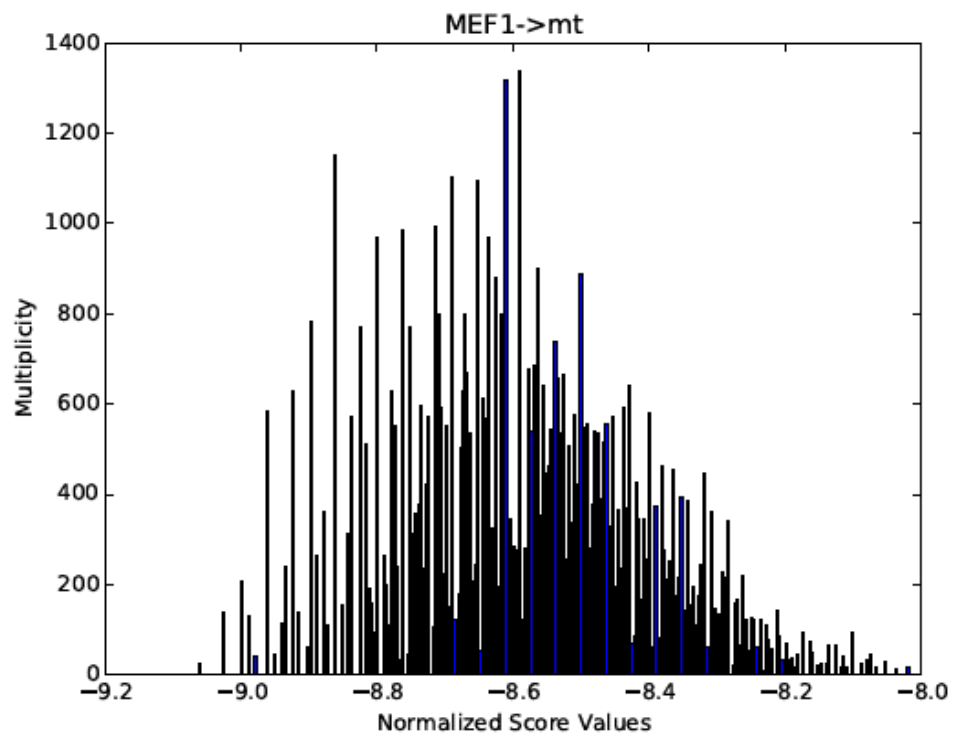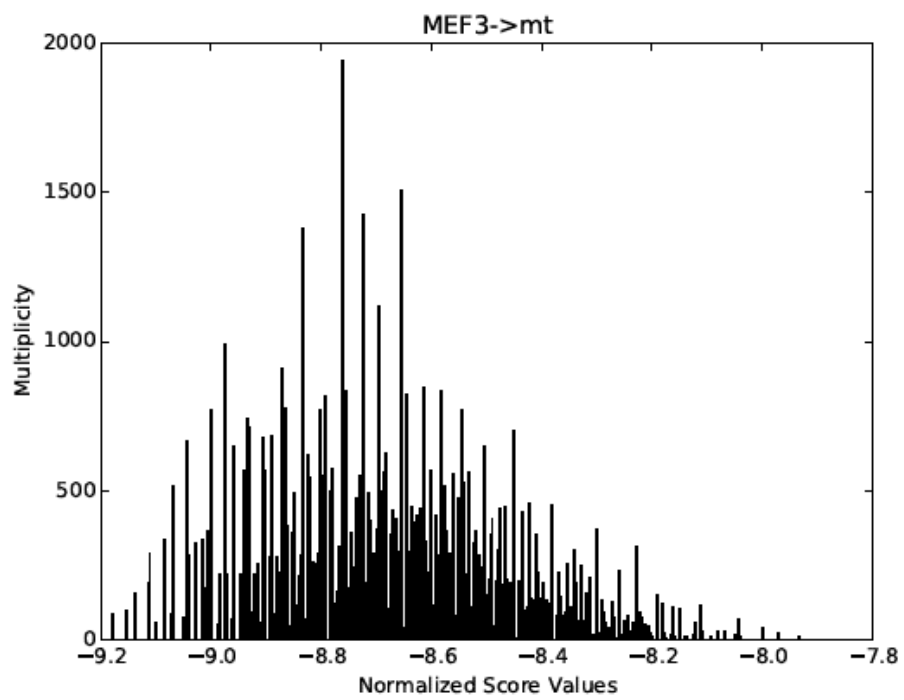

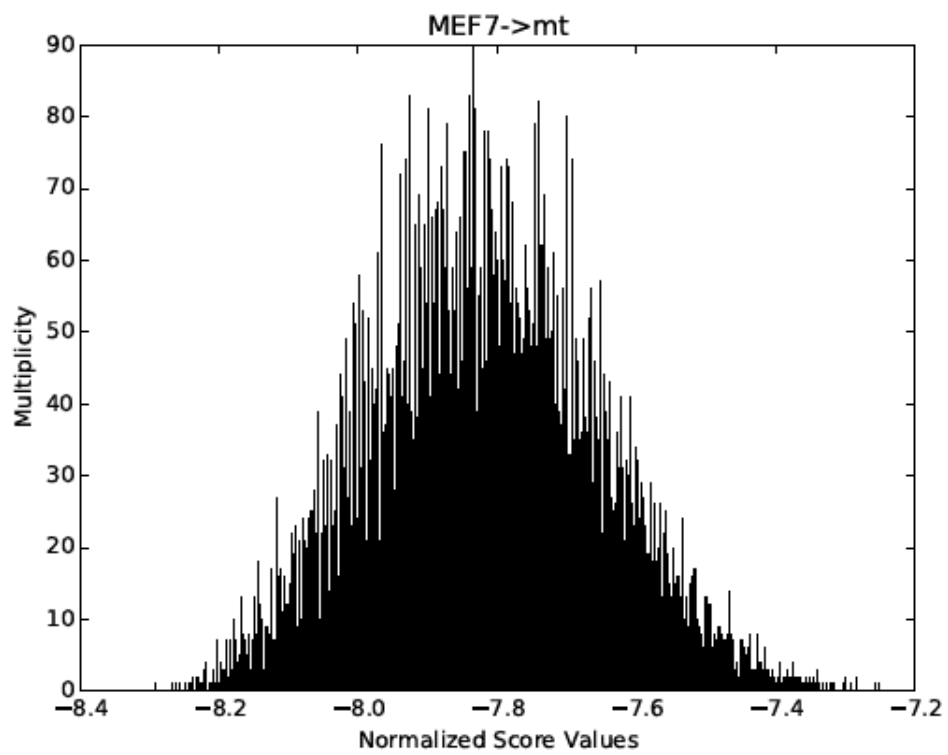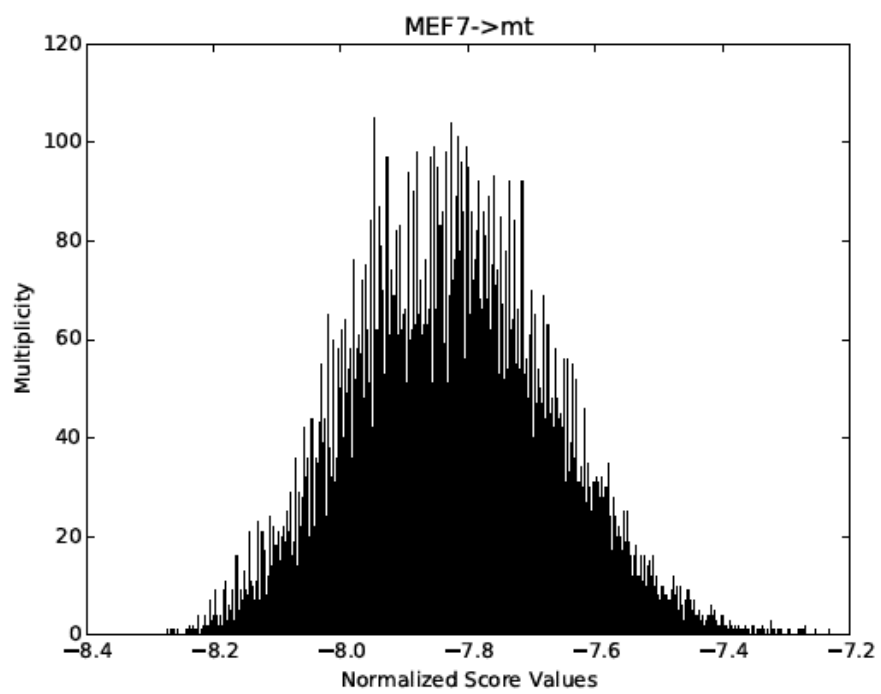

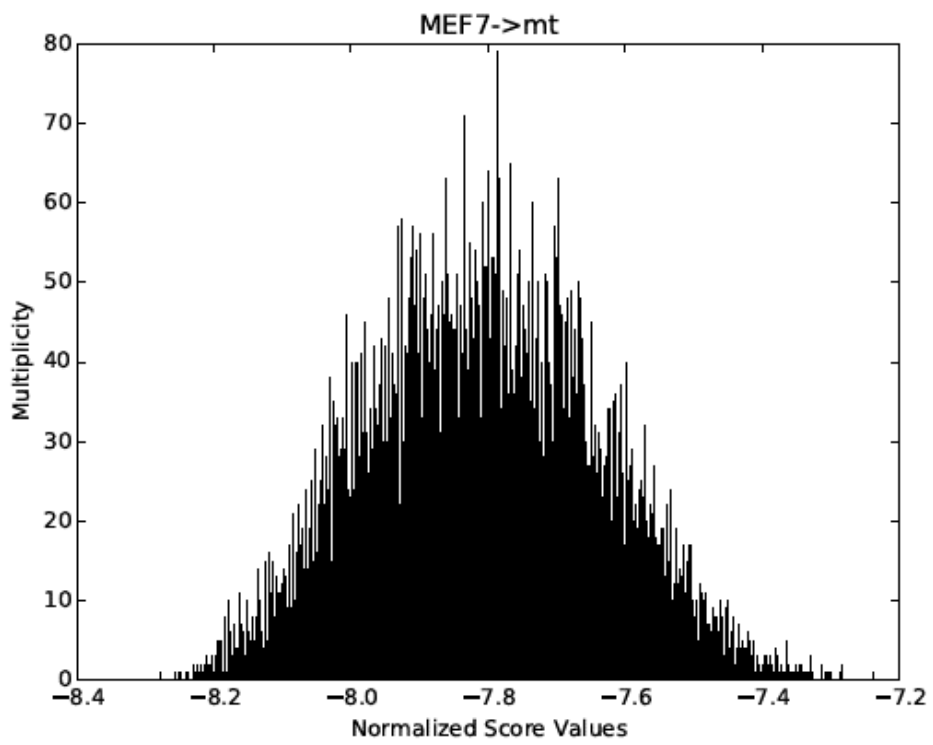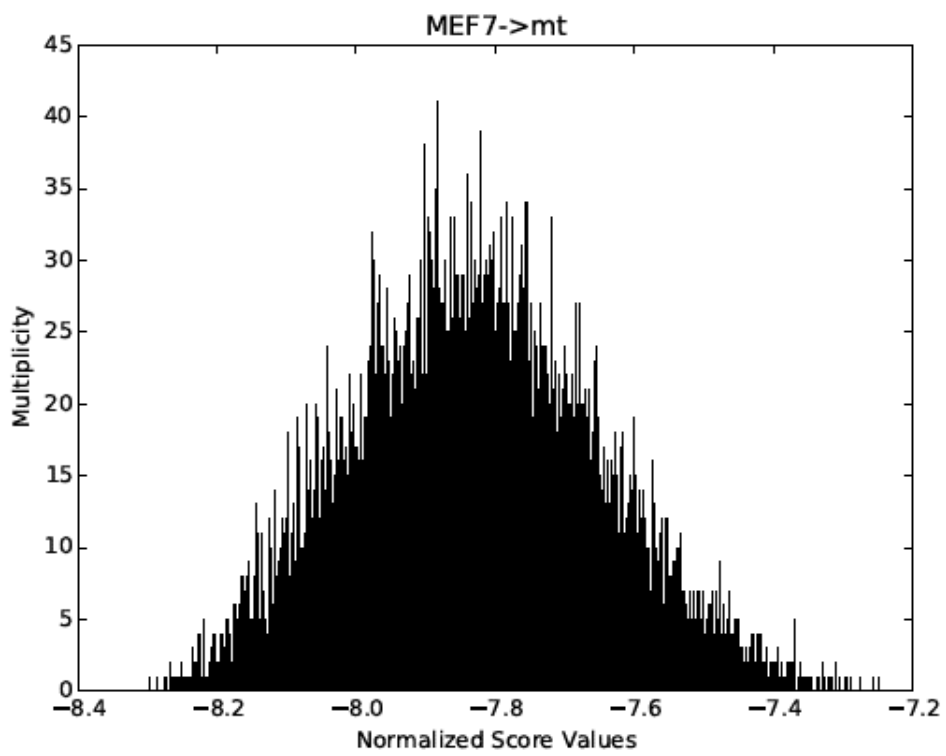

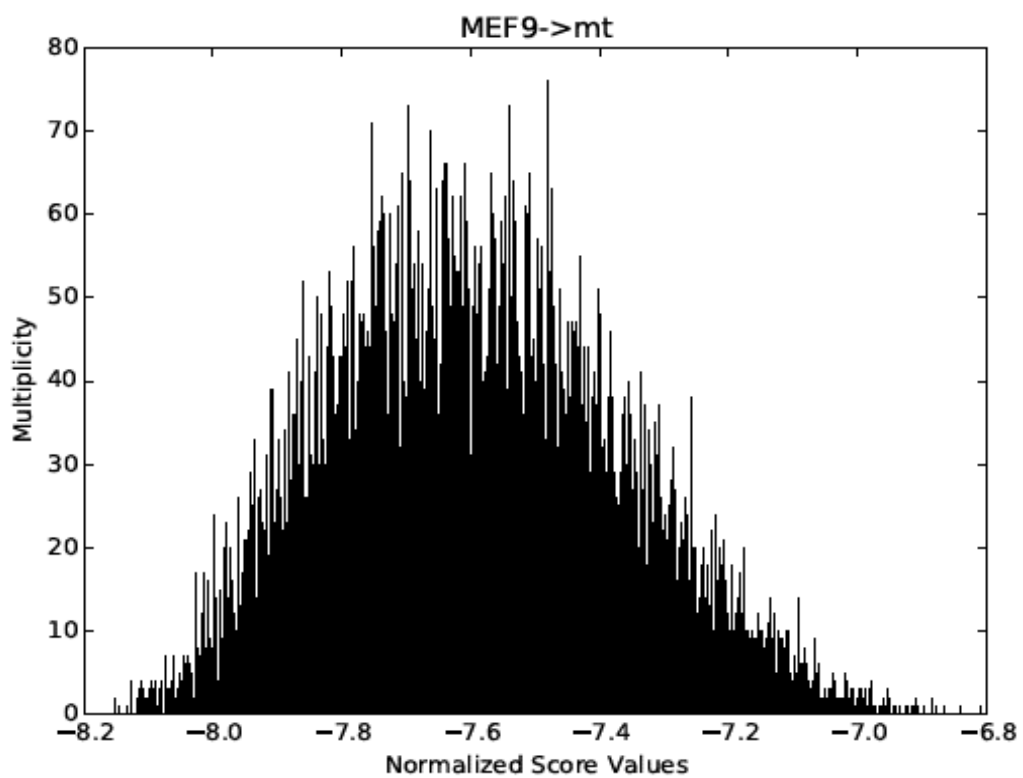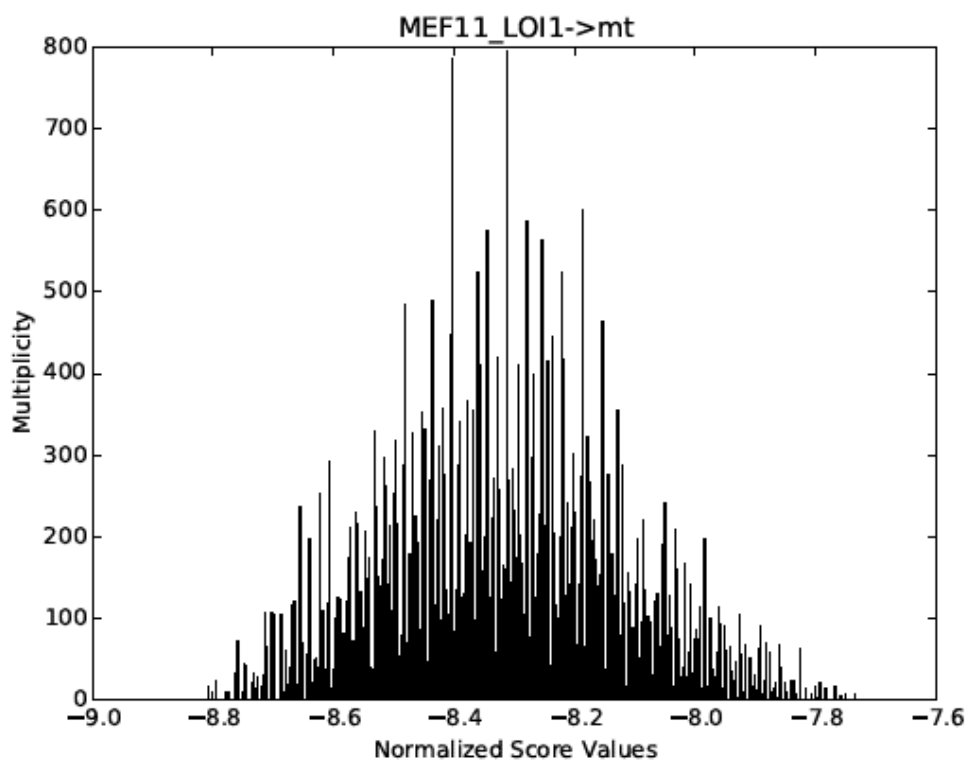

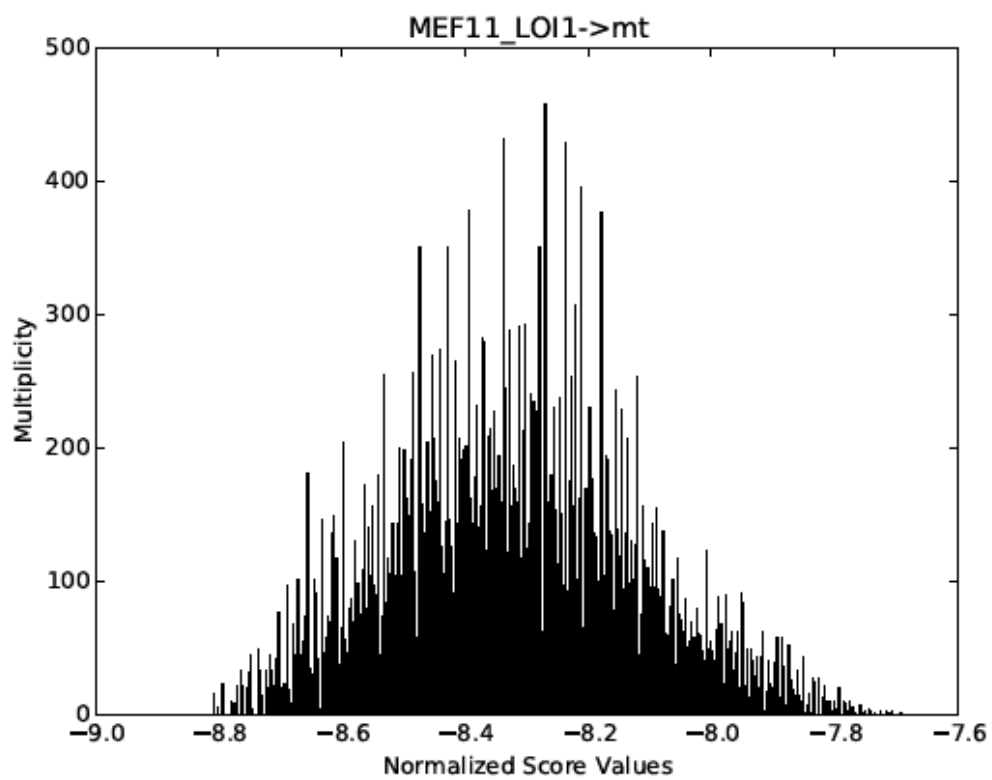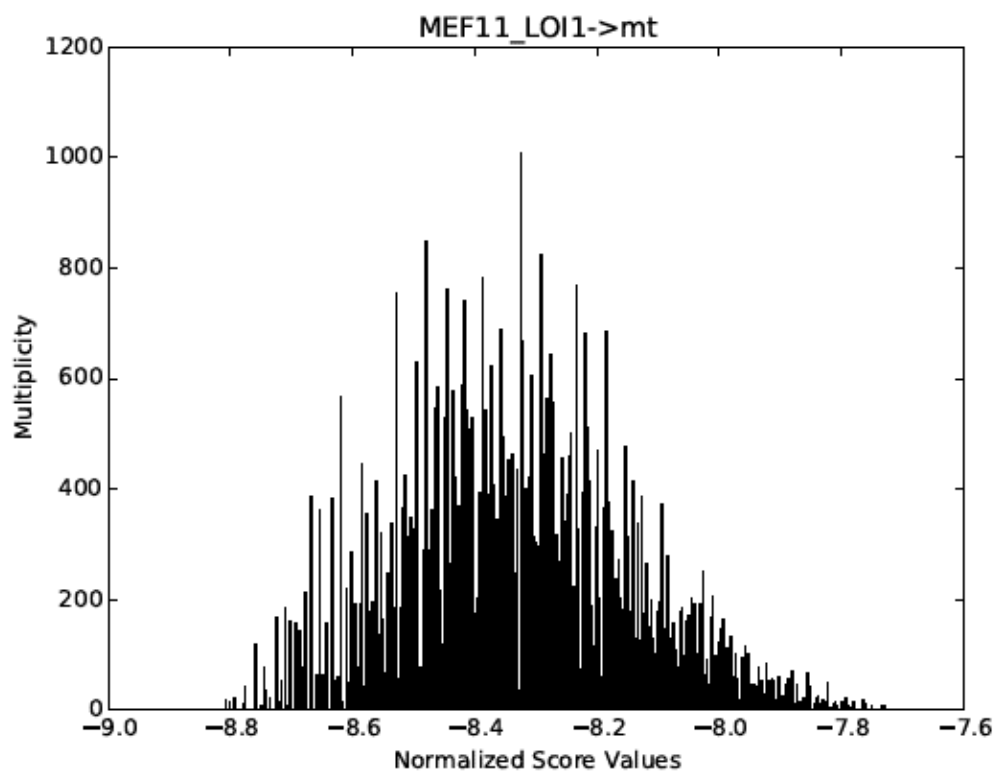



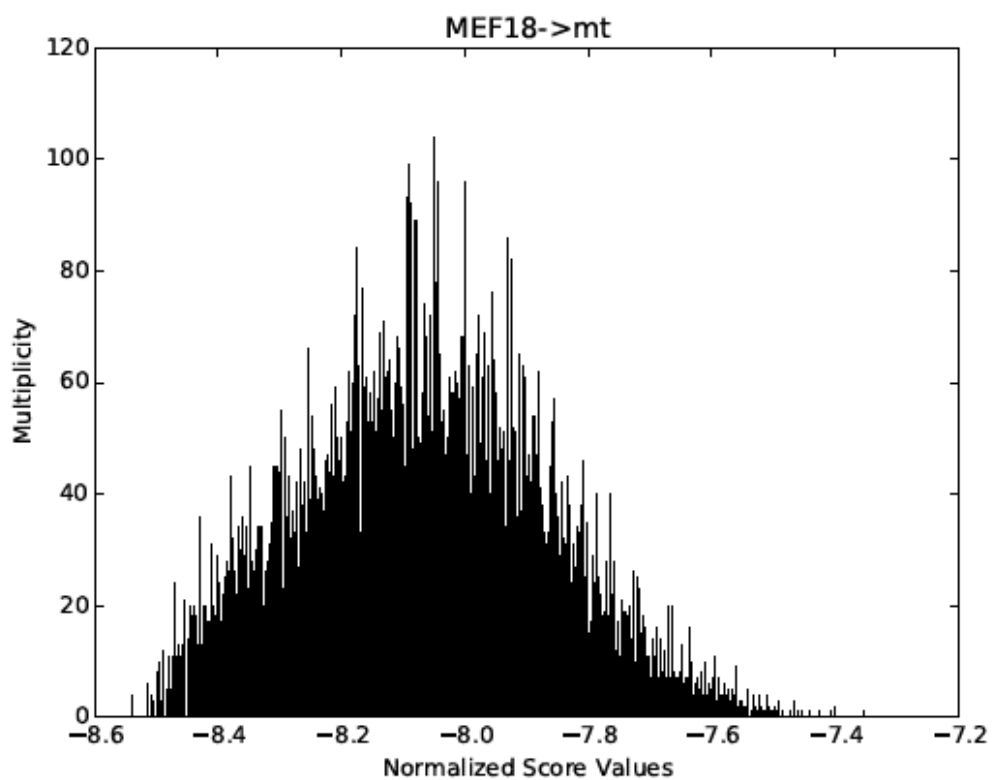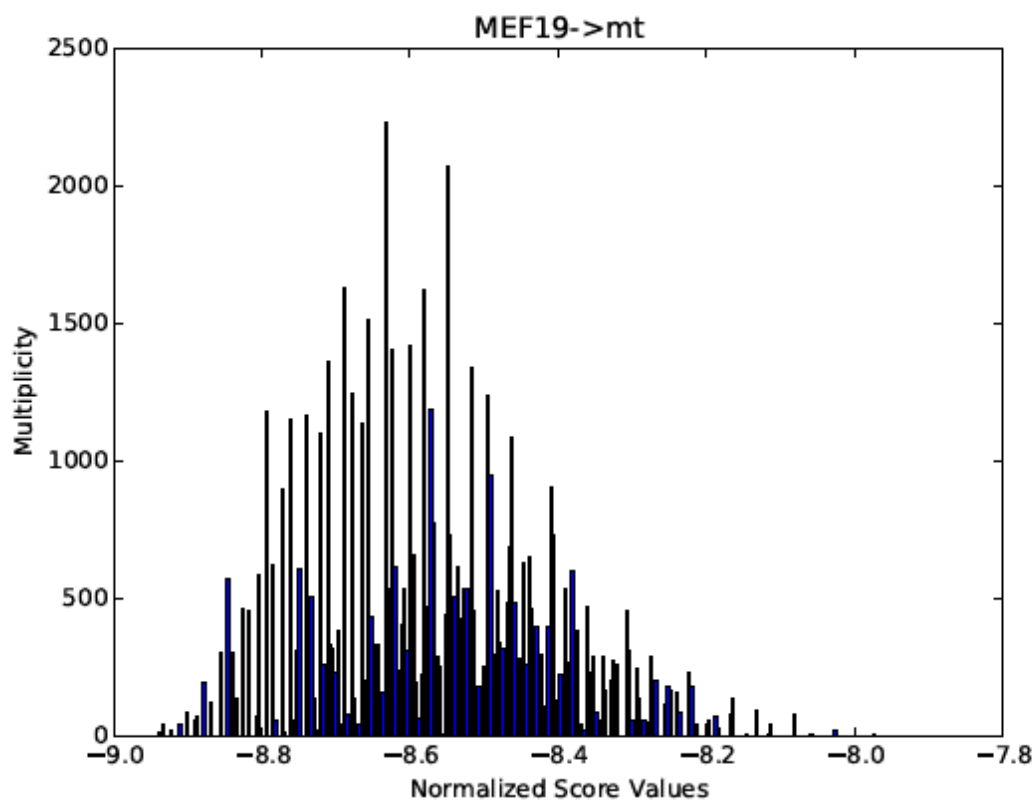

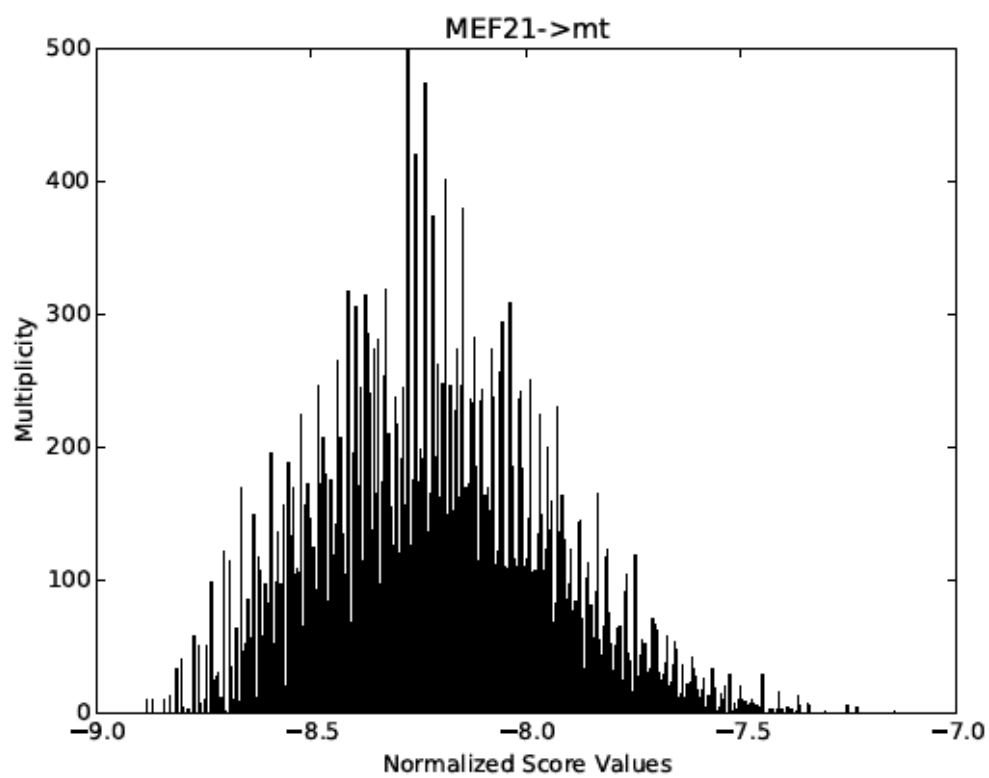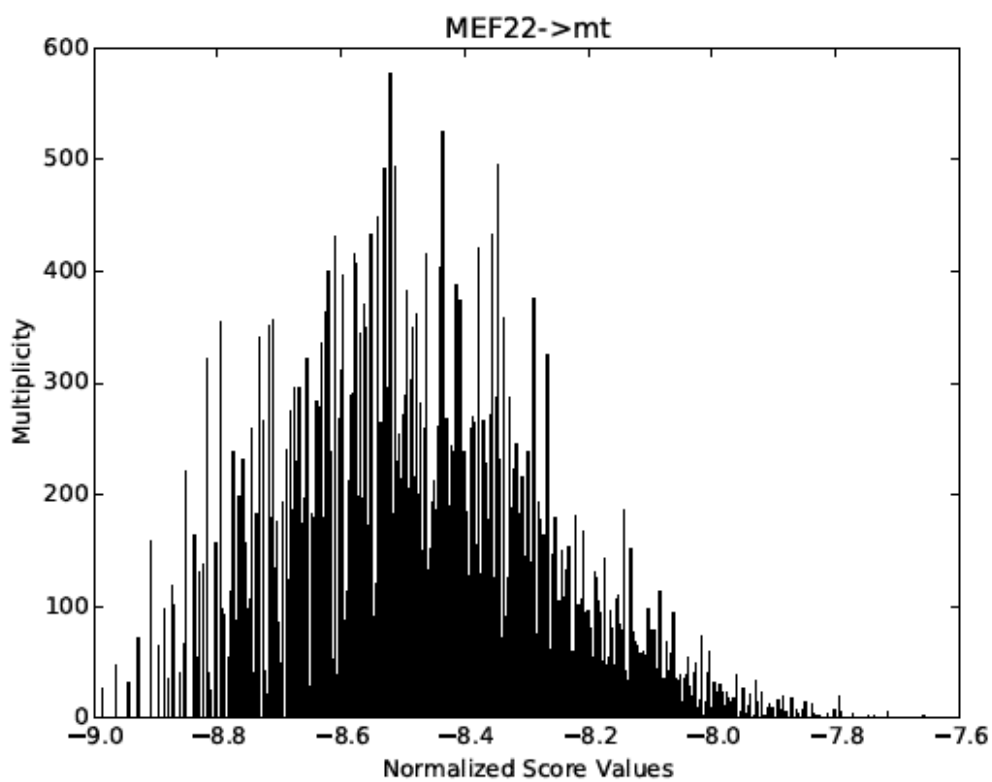

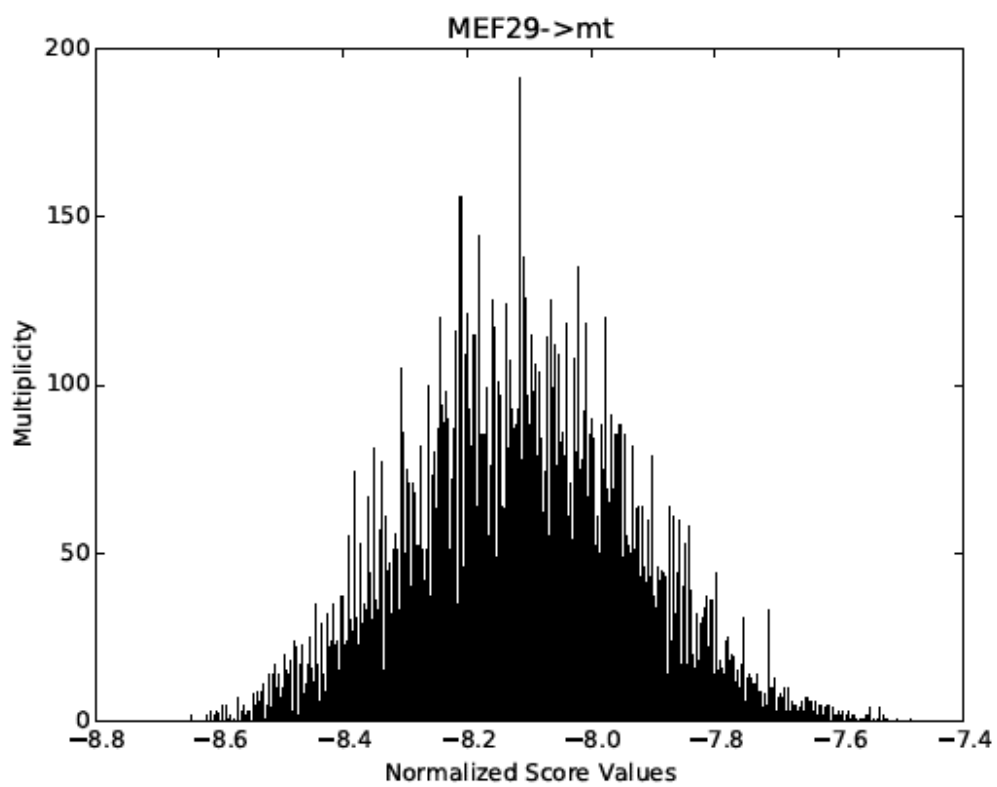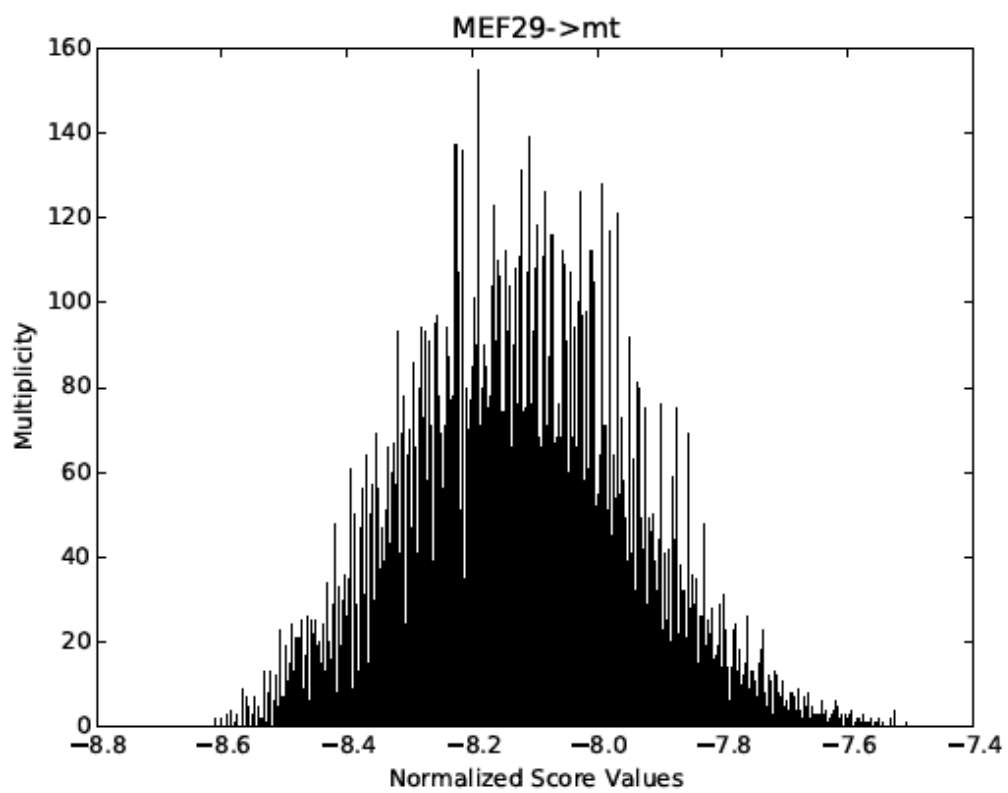

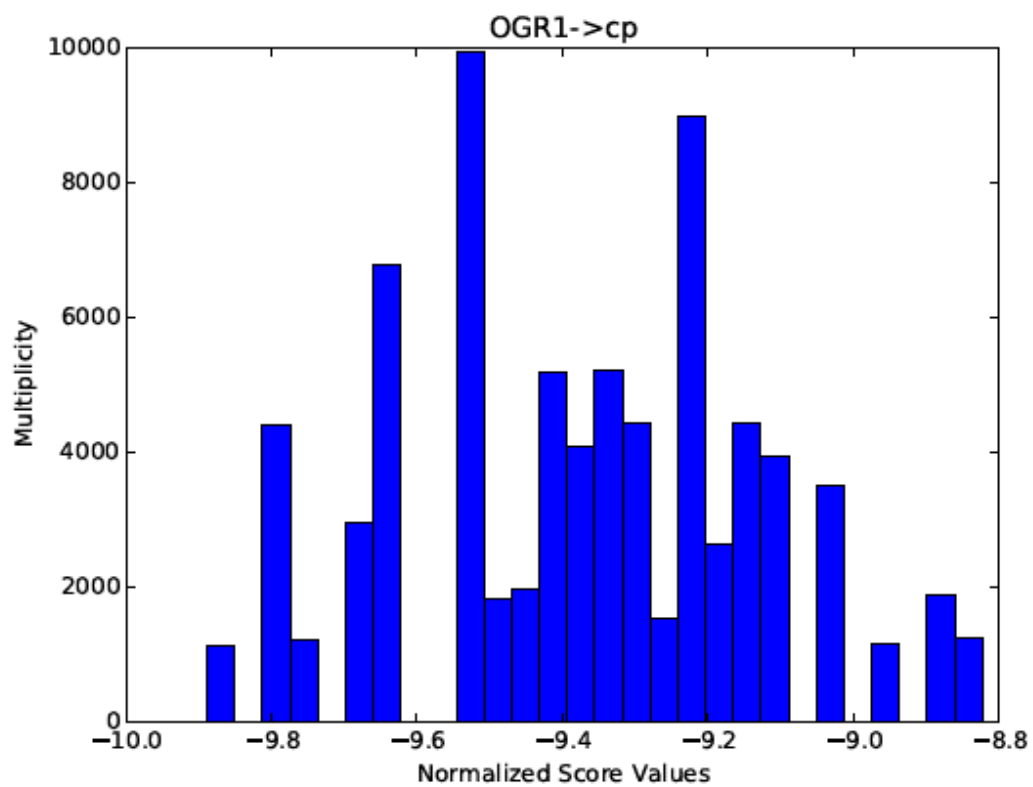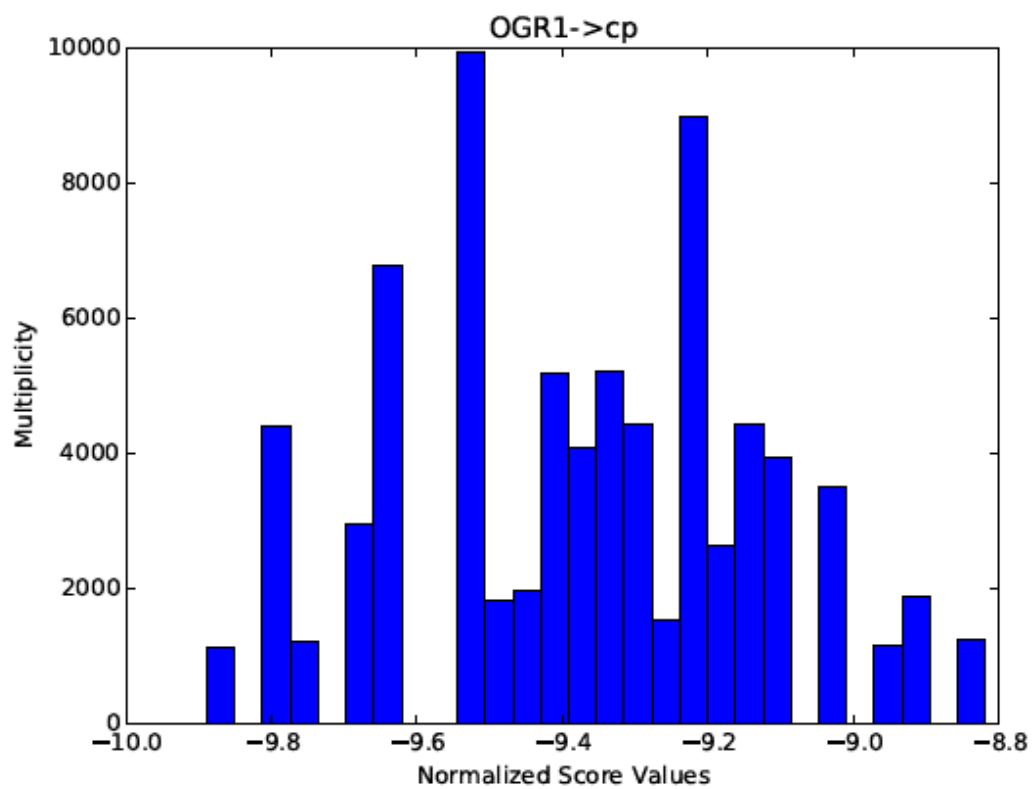

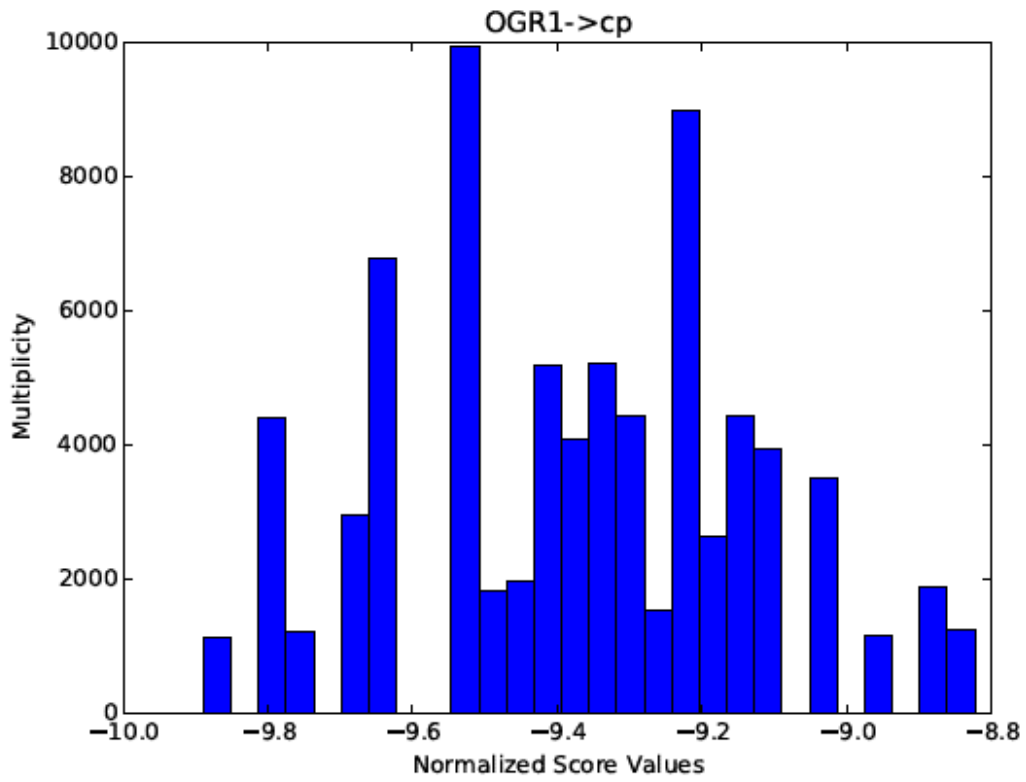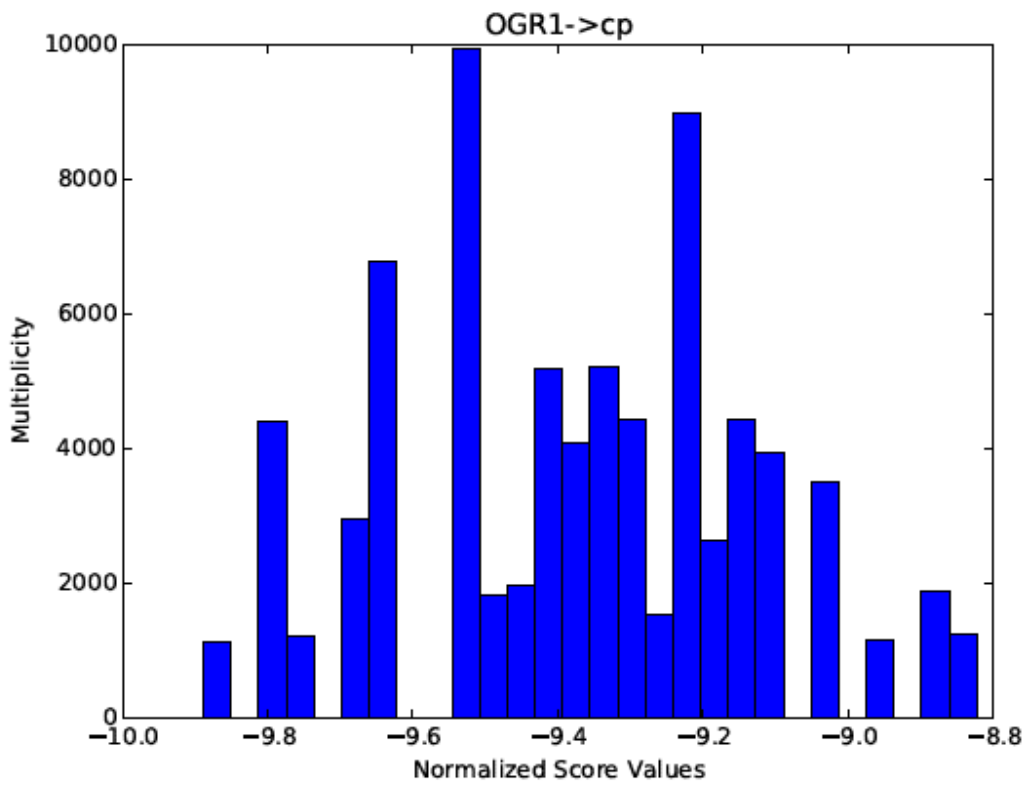

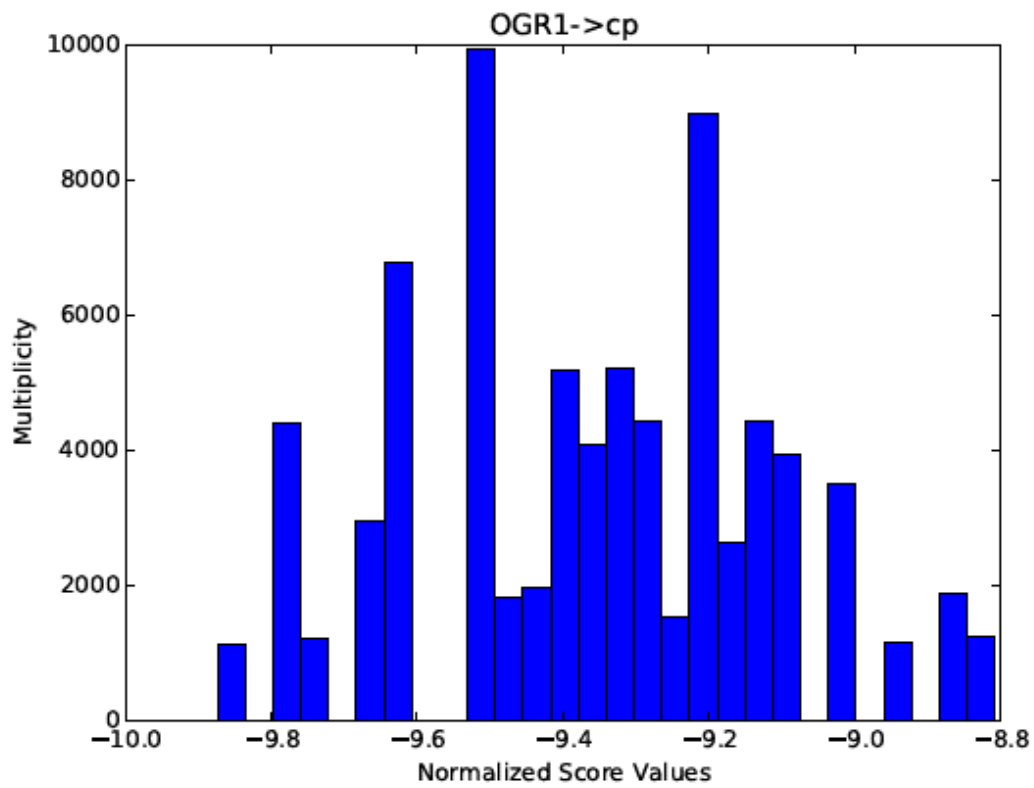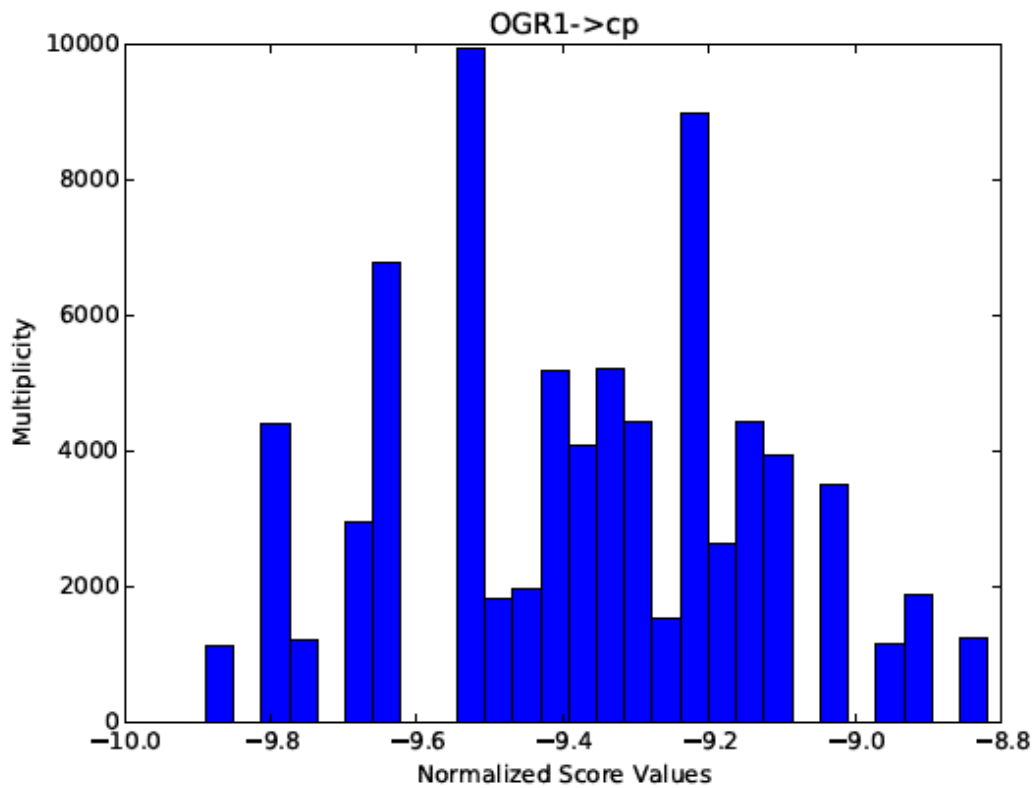

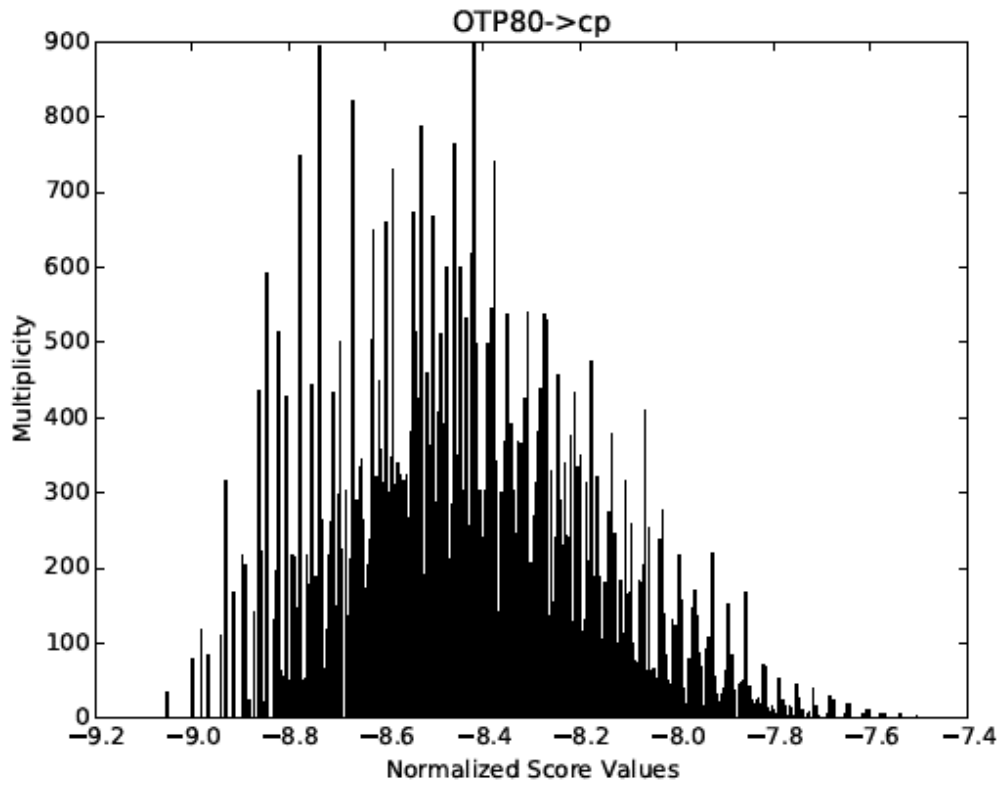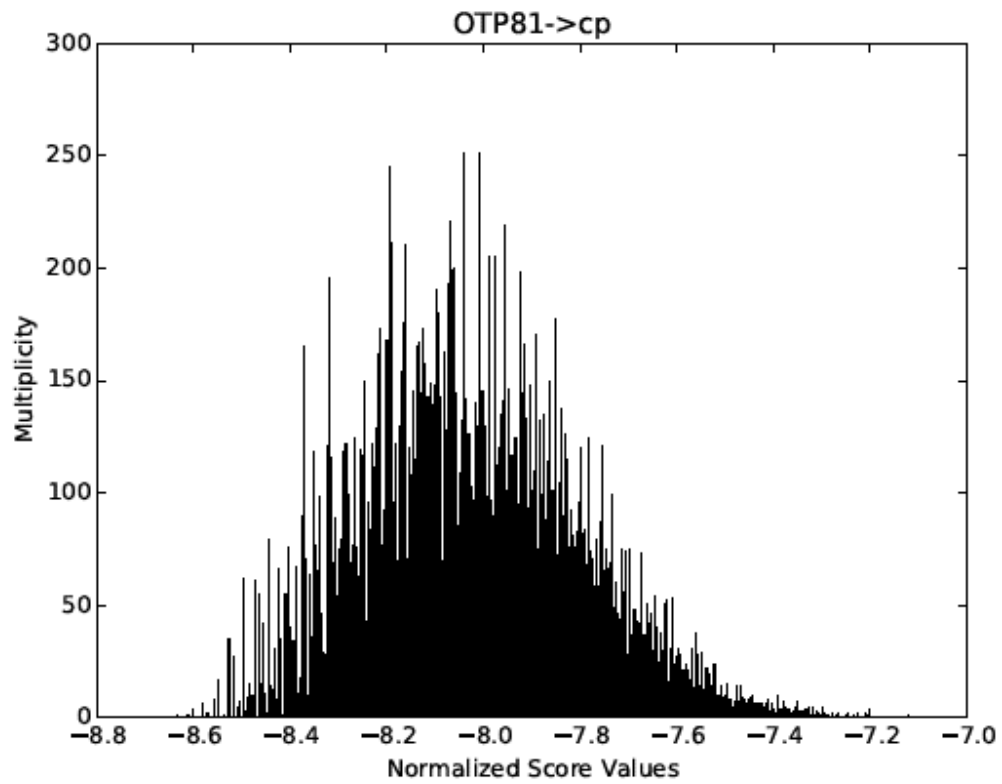

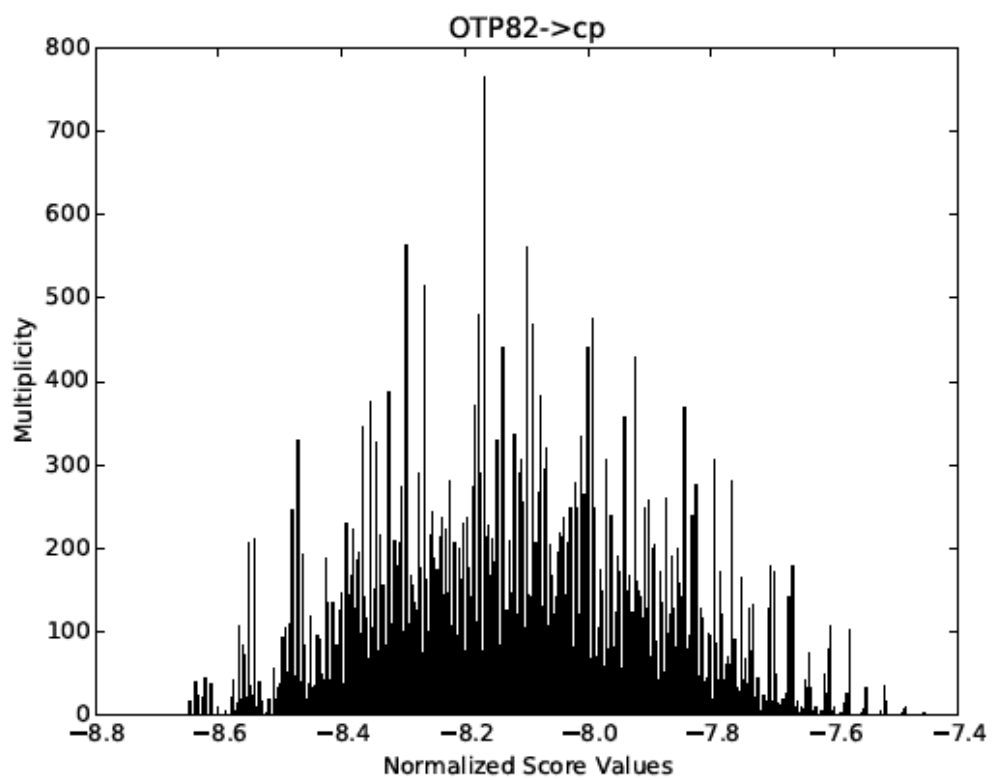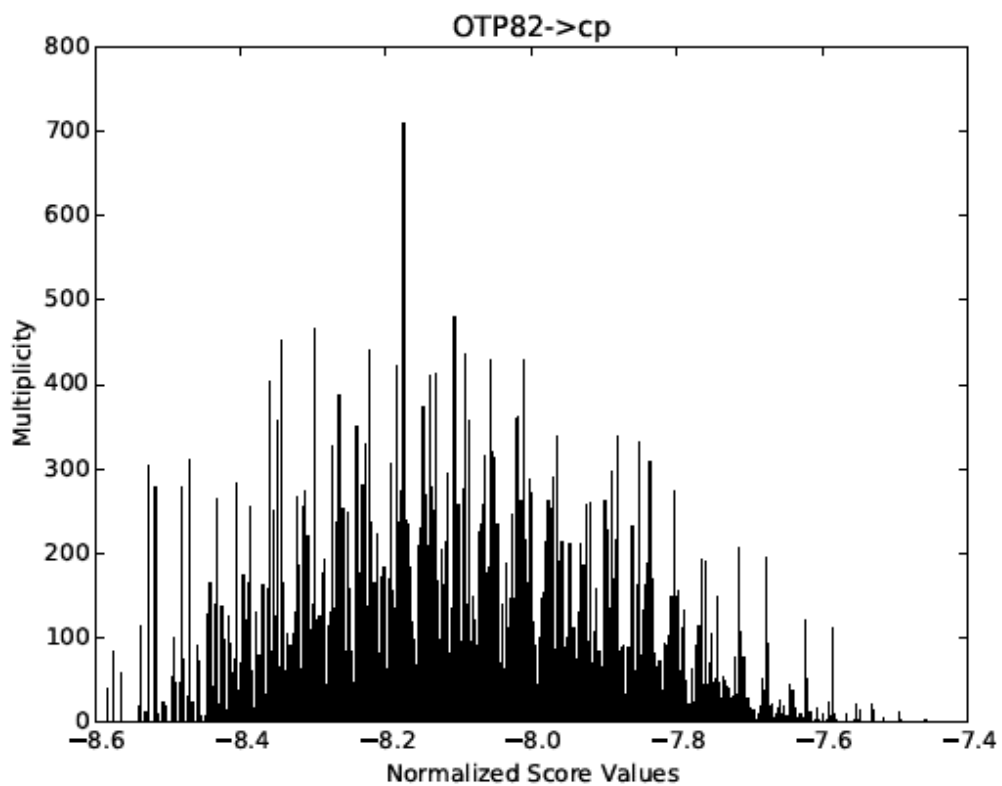



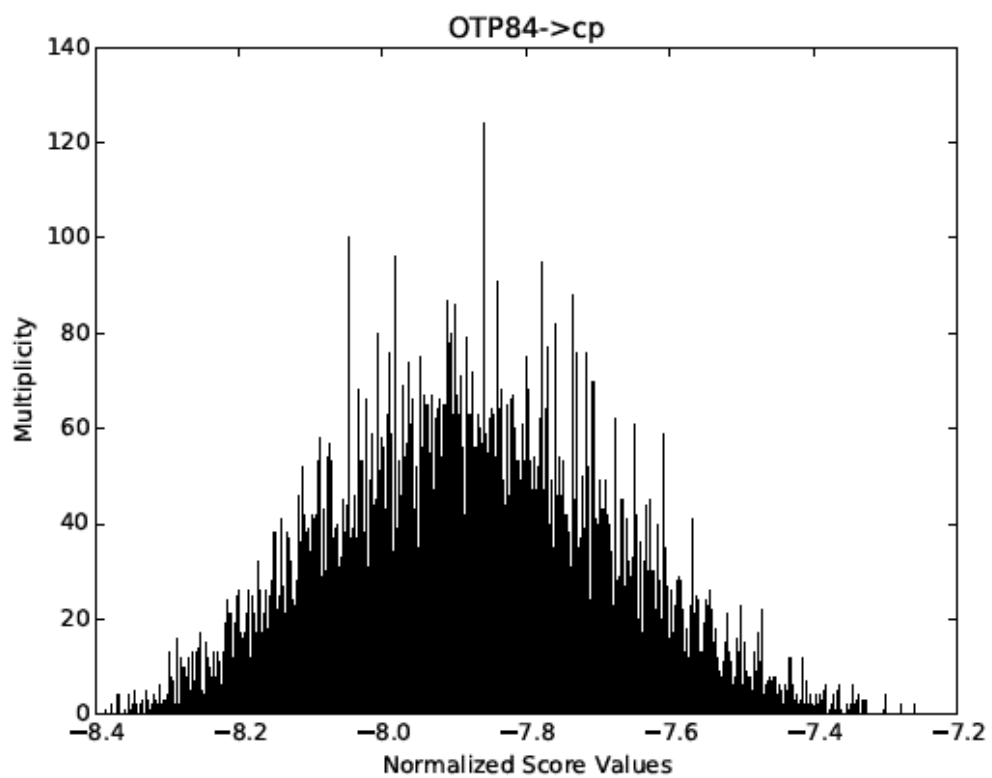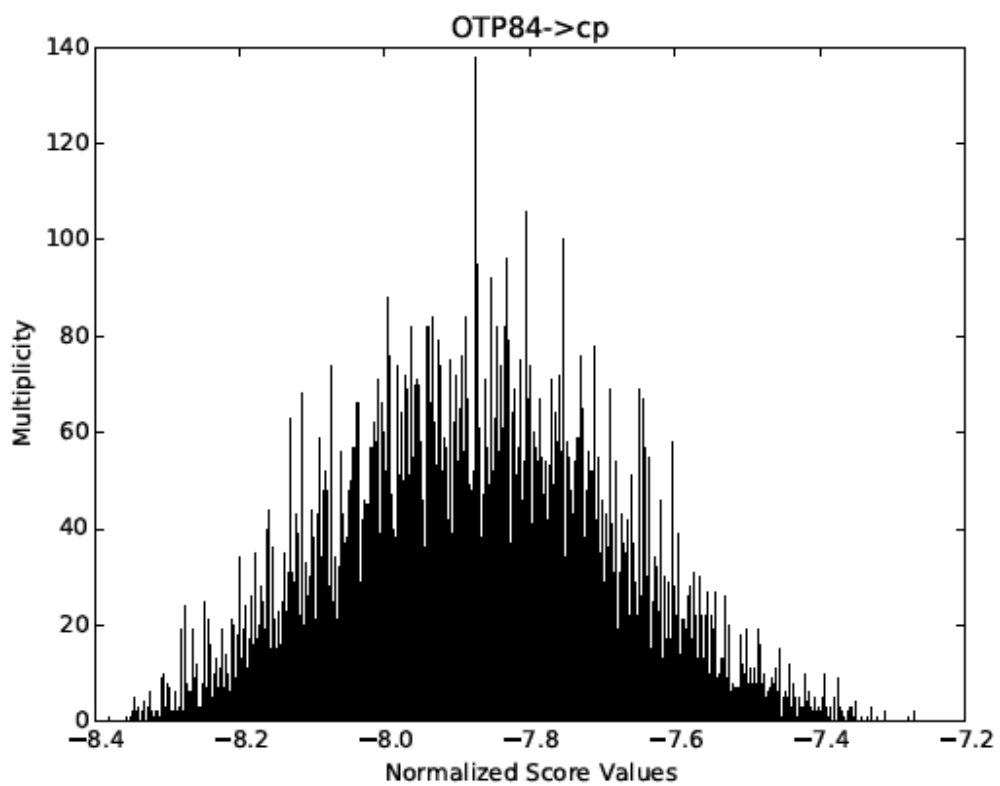

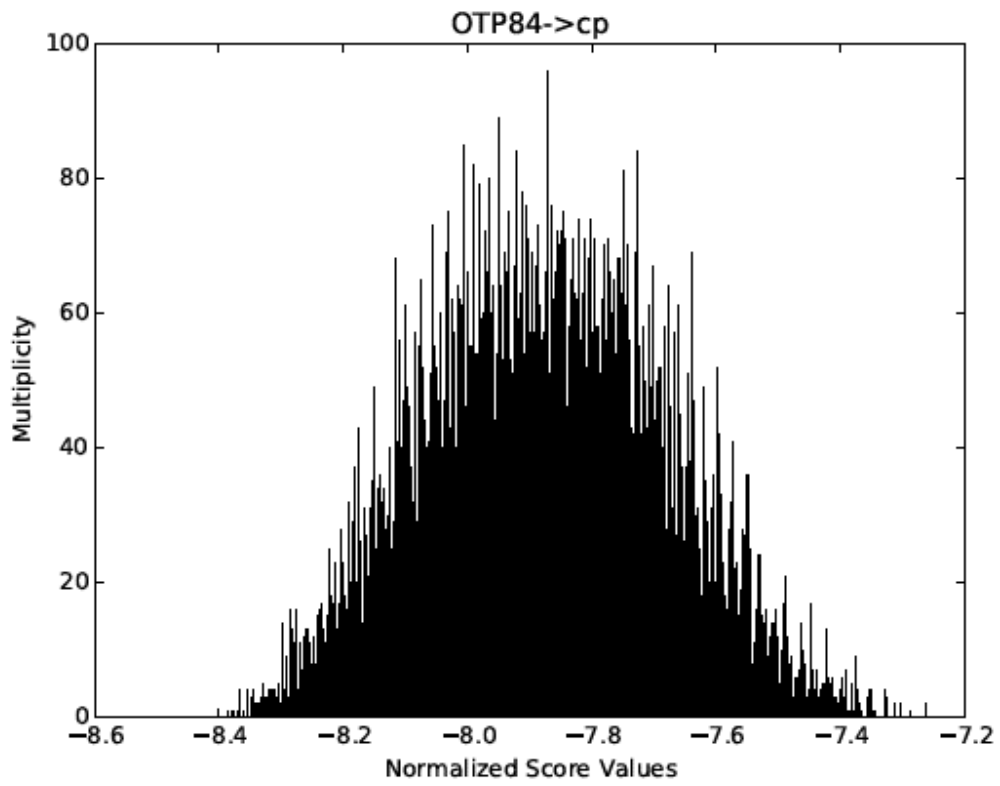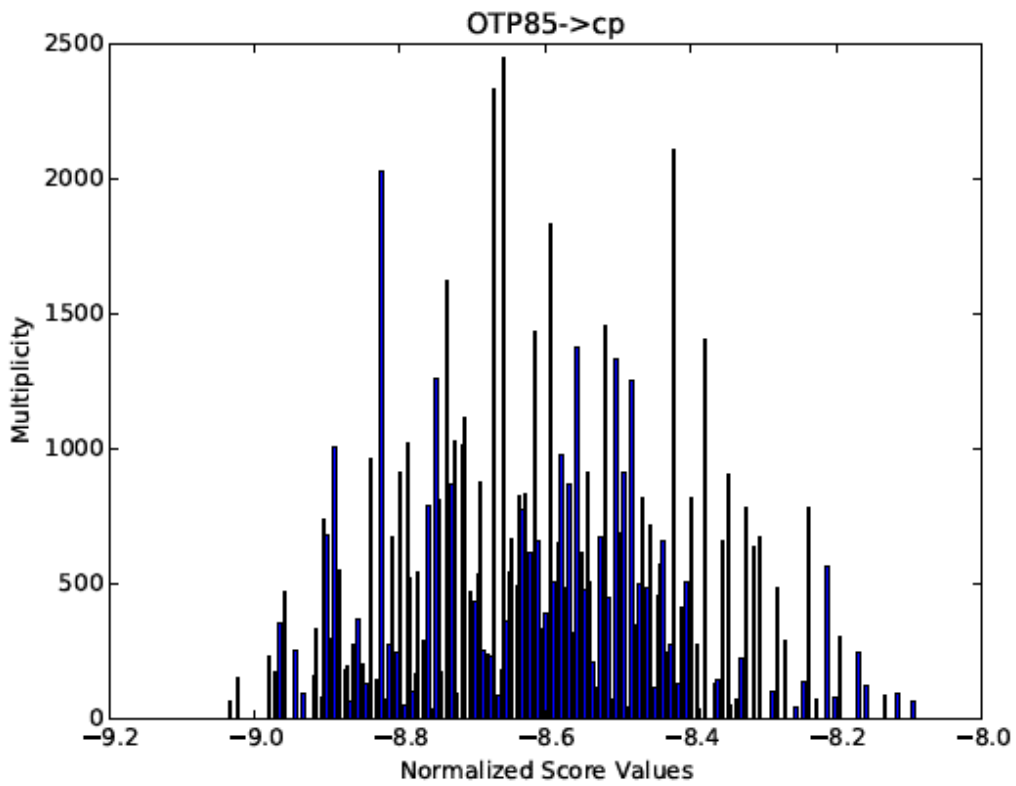

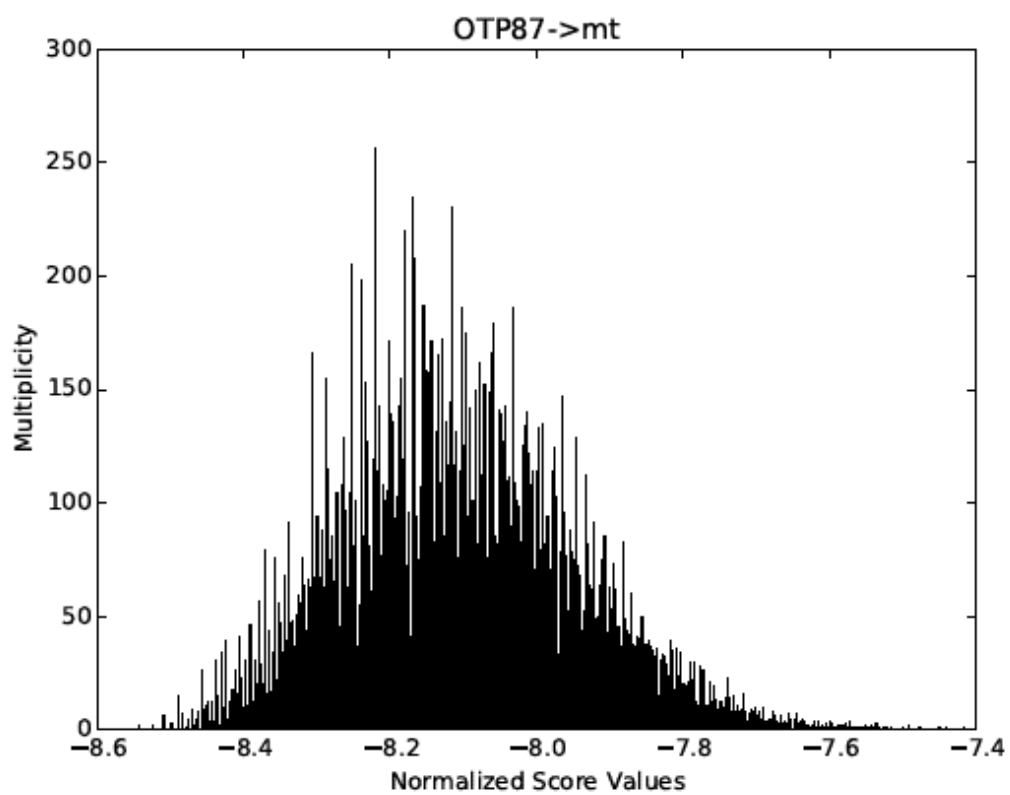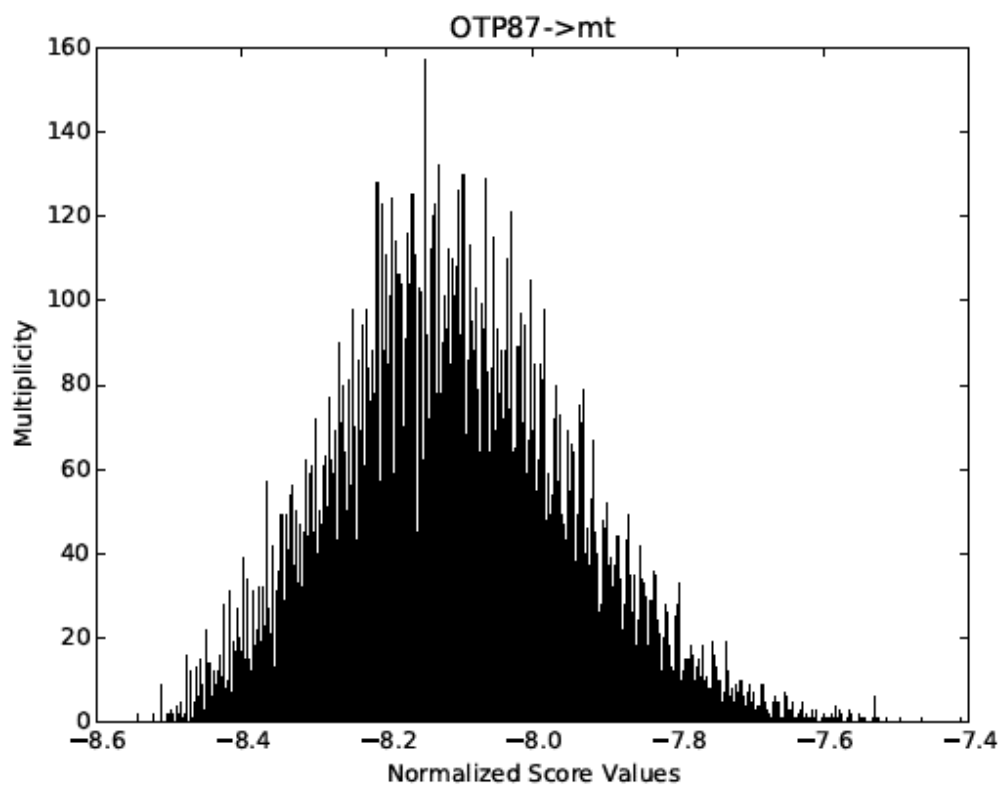

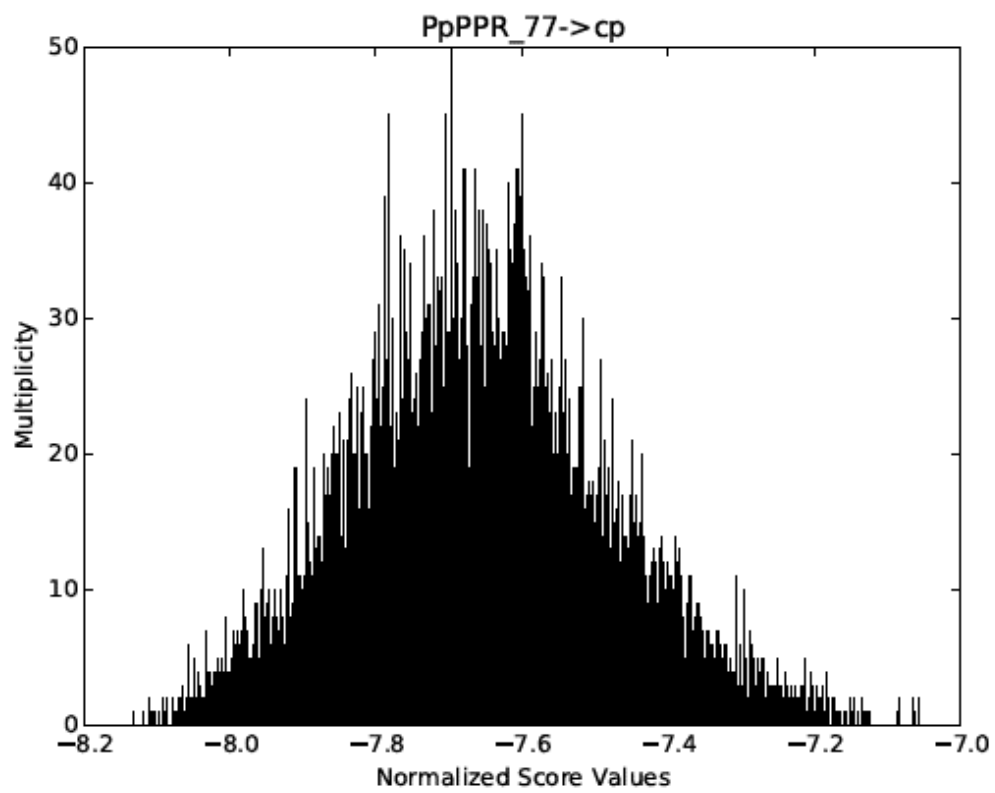

Supplement: pone.0160645.s001.pdf [file pone.0160645.s001.pdf]
